# Supplementary material
Source: publisher figshare collection journal article supplement (https://tandf.figshare.com/articles/dataset/_/1569868)
Supplement: Supplementary file 1 [file 1]

Table S4. Evaluation of *P. falciparum*, *H. sapiens* modeled TGT and *Z. mobilis* TGT structure (1PUD)

| Protein structure        | Ramachandran Plot*, ** | ERRAT score*** | Verify3D <sup>#</sup> |
|--------------------------|------------------------|----------------|-----------------------|
| <i>P. falciparum</i> TGT | 97.50, 2.50            | 69.00          | 87.47                 |
| <i>H. sapiens</i> TGT    | 99.30, 0.70            | 91.02          | 86.05                 |
| 1PUD                     | 100, 0.00              | 96.70          | 98.66                 |

\*Indicates percentage of amino acids present in allowed region.

\*\*Indicates percentage of amino acids present in disallowed region.

\*\*\*Represents overall quality factor of the structure.

<sup>#</sup>Residues that has average 3D-1D score>0.2
