# Supplementary material
Source: publisher figshare collection journal article supplement (https://tandf.figshare.com/articles/dataset/_/1569868)
Supplement: Supplementary file 2 [file 1]

Omega value of amino acids of *P.falciparum* apicoplast TGT protein

| Amino acid position | Amino acids | Probability that $\omega < 1.0$ | Probability that $\omega = 1.0$ | Probability that $\omega > 1.0$ | Omega values | Std. deviation |
|---------------------|-------------|---------------------------------|---------------------------------|---------------------------------|--------------|----------------|
| 1                   | M           | 0.813                           | 0.187                           | 0.000                           | 0.233        | 0.370          |
| 2                   | I           | 0.013                           | 0.967                           | 0.020                           | 1.040        | 0.373          |
| 3                   | K           | 0.173                           | 0.821                           | 0.006                           | 0.853        | 0.410          |
| 4                   | L           | 0.077                           | 0.909                           | 0.014                           | 0.963        | 0.394          |
| 5                   | K           | 0.793                           | 0.207                           | 0.001                           | 0.254        | 0.392          |
| 6                   | L           | 0.000                           | 0.758                           | 0.242                           | 1.612        | 1.091          |
| 7                   | Q           | 0.091                           | 0.901                           | 0.008                           | 0.934        | 0.353          |
| 8                   | I           | 0.074                           | 0.912                           | 0.014                           | 0.967        | 0.391          |
| 9                   | F           | 0.000                           | 0.745                           | 0.255                           | 1.645        | 1.110          |
| 10                  | F           | 0.042                           | 0.921                           | 0.036                           | 1.051        | 0.513          |
| 11                  | V           | 0.038                           | 0.895                           | 0.067                           | 1.134        | 0.667          |
| 12                  | Y           | 0.002                           | 0.774                           | 0.224                           | 1.566        | 1.063          |
| 13                  | I           | 0.001                           | 0.865                           | 0.135                           | 1.341        | 0.869          |
| 14                  | I           | 0.004                           | 0.895                           | 0.101                           | 1.252        | 0.767          |
| 15                  | L           | 0.339                           | 0.628                           | 0.032                           | 0.761        | 0.671          |
| 16                  | N           | 0.731                           | 0.268                           | 0.001                           | 0.312        | 0.429          |
| 17                  | I           | 0.000                           | 0.756                           | 0.244                           | 1.619        | 1.097          |
| 18                  | L           | 0.000                           | 0.246                           | 0.754                           | 2.933        | 1.127          |
| 19                  | I           | 0.004                           | 0.886                           | 0.111                           | 1.276        | 0.798          |
| 20                  | V           | 0.001                           | 0.879                           | 0.120                           | 1.302        | 0.823          |
| 21                  | L           | 0.053                           | 0.912                           | 0.035                           | 1.039        | 0.518          |
| 22                  | V           | 0.007                           | 0.925                           | 0.068                           | 1.166        | 0.645          |
| 23                  | I           | 0.003                           | 0.902                           | 0.096                           | 1.239        | 0.747          |
| 24                  | S           | 0.000                           | 0.544                           | 0.456                           | 2.163        | 1.280          |
| 25                  | K           | 0.005                           | 0.932                           | 0.063                           | 1.154        | 0.618          |
| 26                  | N           | 0.001                           | 0.897                           | 0.102                           | 1.257        | 0.768          |
| 27                  | V           | 0.004                           | 0.876                           | 0.120                           | 1.301        | 0.829          |
| 28                  | V           | 0.103                           | 0.878                           | 0.019                           | 0.952        | 0.457          |
| 29                  | Y           | 0.000                           | 0.576                           | 0.424                           | 2.079        | 1.268          |
| 30                  | N           | 0.006                           | 0.891                           | 0.103                           | 1.255        | 0.777          |
| 31                  | E           | 0.005                           | 0.955                           | 0.040                           | 1.096        | 0.500          |
| 32                  | K           | 0.007                           | 0.945                           | 0.048                           | 1.114        | 0.548          |
| 33                  | K           | 0.000                           | 0.726                           | 0.274                           | 1.693        | 1.135          |
| 34                  | L           | 0.001                           | 0.902                           | 0.097                           | 1.245        | 0.751          |
| 35                  | K           | 0.000                           | 0.122                           | 0.878                           | 3.250        | 0.874          |

| Amino acid position | Amino acids | Probability that $\omega < 1.0$ | Probability that $\omega = 1.0$ | Probability that $\omega > 1.0$ | Omega values | Std. deviation |
|---------------------|-------------|---------------------------------|---------------------------------|---------------------------------|--------------|----------------|
| 36                  | N           | 0.000                           | 0.865                           | 0.134                           | 1.338        | 0.863          |
| 37                  | K           | 0.010                           | 0.951                           | 0.039                           | 1.091        | 0.502          |
| 38                  | N           | 0.075                           | 0.904                           | 0.021                           | 0.984        | 0.449          |
| 39                  | C           | 0.000                           | 0.188                           | 0.812                           | 3.079        | 1.029          |
| 40                  | M           | 0.010                           | 0.954                           | 0.036                           | 1.081        | 0.481          |
| 41                  | L           | 0.002                           | 0.778                           | 0.220                           | 1.556        | 1.057          |
| 42                  | P           | 0.003                           | 0.864                           | 0.133                           | 1.333        | 0.864          |
| 43                  | N           | 0.000                           | 0.694                           | 0.306                           | 1.777        | 1.178          |
| 44                  | R           | 0.001                           | 0.808                           | 0.191                           | 1.482        | 0.998          |
| 45                  | R           | 0.087                           | 0.901                           | 0.012                           | 0.949        | 0.388          |
| 46                  | H           | 0.000                           | 0.657                           | 0.343                           | 1.871        | 1.215          |
| 47                  | K           | 0.824                           | 0.176                           | 0.000                           | 0.223        | 0.365          |
| 48                  | N           | 0.061                           | 0.884                           | 0.055                           | 1.081        | 0.631          |
| 49                  | D           | 0.001                           | 0.827                           | 0.172                           | 1.434        | 0.959          |
| 50                  | L           | 0.000                           | 0.701                           | 0.299                           | 1.757        | 1.168          |
| 51                  | L           | 0.000                           | 0.475                           | 0.525                           | 2.338        | 1.285          |
| 52                  | K           | 0.108                           | 0.879                           | 0.013                           | 0.931        | 0.415          |
| 53                  | R           | 0.000                           | 0.438                           | 0.562                           | 2.435        | 1.281          |
| 54                  | Q           | 0.000                           | 0.514                           | 0.486                           | 2.241        | 1.288          |
| 55                  | V           | 0.031                           | 0.877                           | 0.093                           | 1.205        | 0.761          |
| 56                  | K           | 0.004                           | 0.949                           | 0.048                           | 1.116        | 0.540          |
| 57                  | N           | 0.001                           | 0.859                           | 0.140                           | 1.352        | 0.882          |
| 58                  | R           | 0.000                           | 0.662                           | 0.338                           | 1.859        | 1.209          |
| 59                  | K           | 0.007                           | 0.882                           | 0.111                           | 1.275        | 0.804          |
| 60                  | V           | 0.004                           | 0.887                           | 0.109                           | 1.271        | 0.795          |
| 61                  | I           | 0.000                           | 0.308                           | 0.692                           | 2.772        | 1.201          |
| 62                  | L           | 0.000                           | 0.327                           | 0.673                           | 2.720        | 1.216          |
| 63                  | F           | 0.000                           | 0.142                           | 0.858                           | 3.199        | 0.925          |
| 64                  | N           | 0.001                           | 0.910                           | 0.089                           | 1.225        | 0.724          |
| 65                  | D           | 0.000                           | 0.792                           | 0.208                           | 1.526        | 1.033          |
| 66                  | H           | 0.000                           | 0.377                           | 0.623                           | 2.592        | 1.253          |
| 67                  | N           | 0.016                           | 0.968                           | 0.016                           | 1.026        | 0.340          |
| 68                  | I           | 0.064                           | 0.911                           | 0.026                           | 1.005        | 0.468          |
| 69                  | E           | 0.001                           | 0.891                           | 0.108                           | 1.272        | 0.788          |
| 70                  | L           | 0.000                           | 0.726                           | 0.274                           | 1.695        | 1.138          |
| 71                  | I           | 0.003                           | 0.828                           | 0.169                           | 1.426        | 0.954          |

| Amino acid position | Amino acids | Probability that $\omega < 1.0$ | Probability that $\omega = 1.0$ | Probability that $\omega > 1.0$ | Omega values | Std. deviation |
|---------------------|-------------|---------------------------------|---------------------------------|---------------------------------|--------------|----------------|
| 72                  | N           | 0.000                           | 0.708                           | 0.291                           | 1.740        | 1.163          |
| 73                  | L           | 0.000                           | 0.785                           | 0.215                           | 1.545        | 1.048          |
| 74                  | K           | 0.008                           | 0.974                           | 0.018                           | 1.038        | 0.346          |
| 75                  | R           | 0.000                           | 0.188                           | 0.812                           | 3.082        | 1.028          |
| 76                  | K           | 0.019                           | 0.924                           | 0.056                           | 1.124        | 0.601          |
| 77                  | Y           | 0.000                           | 0.848                           | 0.152                           | 1.383        | 0.910          |
| 78                  | N           | 0.000                           | 0.821                           | 0.179                           | 1.453        | 0.977          |
| 79                  | K           | 0.189                           | 0.807                           | 0.004                           | 0.833        | 0.406          |
| 80                  | R           | 0.001                           | 0.891                           | 0.108                           | 1.272        | 0.787          |
| 81                  | T           | 0.000                           | 0.287                           | 0.713                           | 2.825        | 1.176          |
| 82                  | K           | 0.159                           | 0.835                           | 0.006                           | 0.867        | 0.402          |
| 83                  | Y           | 0.113                           | 0.881                           | 0.006                           | 0.909        | 0.357          |
| 84                  | K           | 0.003                           | 0.860                           | 0.137                           | 1.343        | 0.874          |
| 85                  | N           | 0.000                           | 0.219                           | 0.781                           | 3.001        | 1.084          |
| 86                  | L           | 0.000                           | 0.842                           | 0.158                           | 1.399        | 0.926          |
| 87                  | D           | 0.003                           | 0.922                           | 0.074                           | 1.184        | 0.666          |
| 88                  | A           | 0.000                           | 0.687                           | 0.313                           | 1.795        | 1.184          |
| 89                  | F           | 0.004                           | 0.883                           | 0.113                           | 1.283        | 0.808          |
| 90                  | I           | 0.008                           | 0.960                           | 0.032                           | 1.072        | 0.452          |
| 91                  | T           | 0.155                           | 0.837                           | 0.009                           | 0.876        | 0.419          |
| 92                  | N           | 0.001                           | 0.932                           | 0.066                           | 1.165        | 0.627          |
| 93                  | L           | 0.000                           | 0.444                           | 0.556                           | 2.418        | 1.279          |
| 94                  | K           | 0.008                           | 0.935                           | 0.057                           | 1.137        | 0.595          |
| 95                  | V           | 0.000                           | 0.859                           | 0.141                           | 1.356        | 0.884          |
| 96                  | T           | 0.001                           | 0.940                           | 0.059                           | 1.146        | 0.593          |
| 97                  | H           | 0.000                           | 0.763                           | 0.237                           | 1.600        | 1.083          |
| 98                  | V           | 0.000                           | 0.733                           | 0.267                           | 1.675        | 1.125          |
| 99                  | V           | 0.000                           | 0.845                           | 0.155                           | 1.390        | 0.917          |
| 100                 | N           | 0.000                           | 0.740                           | 0.260                           | 1.658        | 1.116          |
| 101                 | H           | 0.001                           | 0.941                           | 0.058                           | 1.145        | 0.591          |
| 102                 | N           | 0.153                           | 0.839                           | 0.007                           | 0.875        | 0.408          |
| 103                 | K           | 0.001                           | 0.925                           | 0.074                           | 1.186        | 0.664          |
| 104                 | S           | 0.000                           | 0.665                           | 0.335                           | 1.851        | 1.204          |
| 105                 | I           | 0.000                           | 0.857                           | 0.142                           | 1.359        | 0.886          |
| 106                 | I           | 0.000                           | 0.218                           | 0.782                           | 3.001        | 1.081          |
| 107                 | T           | 0.050                           | 0.936                           | 0.014                           | 0.989        | 0.363          |

| Amino acid position | Amino acids | Probability that $\omega < 1.0$ | Probability that $\omega = 1.0$ | Probability that $\omega > 1.0$ | Omega values | Std. deviation |
|---------------------|-------------|---------------------------------|---------------------------------|---------------------------------|--------------|----------------|
| 108                 | Y           | 0.001                           | 0.944                           | 0.055                           | 1.137        | 0.573          |
| 109                 | V           | 0.000                           | 0.318                           | 0.682                           | 2.744        | 1.209          |
| 110                 | K           | 0.019                           | 0.898                           | 0.083                           | 1.193        | 0.717          |
| 111                 | K           | 0.012                           | 0.972                           | 0.015                           | 1.028        | 0.327          |
| 112                 | K           | 0.005                           | 0.951                           | 0.044                           | 1.105        | 0.520          |
| 113                 | K           | 0.001                           | 0.895                           | 0.105                           | 1.263        | 0.774          |
| 114                 | L           | 0.000                           | 0.191                           | 0.809                           | 3.073        | 1.033          |
| 115                 | L           | 0.041                           | 0.922                           | 0.037                           | 1.054        | 0.518          |
| 116                 | F           | 0.008                           | 0.974                           | 0.018                           | 1.037        | 0.341          |
| 117                 | S           | 0.000                           | 0.666                           | 0.334                           | 1.846        | 1.202          |
| 118                 | N           | 0.010                           | 0.953                           | 0.037                           | 1.083        | 0.486          |
| 119                 | K           | 0.832                           | 0.167                           | 0.000                           | 0.215        | 0.356          |
| 120                 | I           | 0.012                           | 0.981                           | 0.008                           | 1.009        | 0.240          |
| 121                 | Y           | 0.000                           | 0.998                           | 0.002                           | 1.004        | 0.095          |
| 122                 | N           | 0.000                           | 0.094                           | 0.906                           | 3.320        | 0.788          |
| 123                 | H           | 0.000                           | 0.001                           | 1.000                           | 3.561        | 0.268          |
| 124                 | F           | 0.005                           | 0.990                           | 0.005                           | 1.008        | 0.190          |
| 125                 | N           | 0.024                           | 0.973                           | 0.003                           | 0.985        | 0.198          |
| 126                 | Y           | 0.001                           | 0.939                           | 0.060                           | 1.150        | 0.598          |
| 127                 | P           | 0.000                           | 0.934                           | 0.066                           | 1.164        | 0.621          |
| 128                 | G           | 0.000                           | 0.384                           | 0.616                           | 2.565        | 1.249          |
| 129                 | F           | 0.501                           | 0.499                           | 0.000                           | 0.528        | 0.471          |
| 130                 | D           | 0.000                           | 0.818                           | 0.182                           | 1.458        | 0.975          |
| 131                 | F           | 0.044                           | 0.956                           | 0.000                           | 0.961        | 0.196          |
| 132                 | S           | 0.000                           | 0.845                           | 0.155                           | 1.389        | 0.911          |
| 133                 | V           | 0.000                           | 0.985                           | 0.014                           | 1.035        | 0.296          |
| 134                 | L           | 0.000                           | 0.281                           | 0.719                           | 2.835        | 1.165          |
| 135                 | K           | 0.000                           | 0.977                           | 0.023                           | 1.058        | 0.379          |
| 136                 | E           | 0.580                           | 0.420                           | 0.000                           | 0.454        | 0.465          |
| 137                 | N           | 0.000                           | 0.809                           | 0.191                           | 1.484        | 1.001          |
| 138                 | N           | 0.000                           | 0.076                           | 0.924                           | 3.369        | 0.722          |
| 139                 | N           | 0.000                           | 0.671                           | 0.329                           | 1.830        | 1.192          |
| 140                 | E           | 0.001                           | 0.983                           | 0.016                           | 1.038        | 0.313          |
| 141                 | Q           | 0.000                           | 0.412                           | 0.588                           | 2.498        | 1.266          |
| 142                 | D           | 0.000                           | 0.908                           | 0.092                           | 1.231        | 0.727          |
| 143                 | K           | 0.000                           | 0.683                           | 0.317                           | 1.803        | 1.184          |

| Amino acid position | Amino acids | Probability that $\omega < 1.0$ | Probability that $\omega = 1.0$ | Probability that $\omega > 1.0$ | Omega values | Std. deviation |
|---------------------|-------------|---------------------------------|---------------------------------|---------------------------------|--------------|----------------|
| 144                 | S           | 0.063                           | 0.937                           | 0.000                           | 0.942        | 0.227          |
| 145                 | R           | 0.735                           | 0.264                           | 0.000                           | 0.307        | 0.421          |
| 146                 | I           | 0.000                           | 0.200                           | 0.800                           | 3.047        | 1.047          |
| 147                 | G           | 0.247                           | 0.752                           | 0.000                           | 0.768        | 0.408          |
| 148                 | I           | 0.000                           | 0.889                           | 0.111                           | 1.279        | 0.794          |
| 149                 | I           | 0.043                           | 0.957                           | 0.001                           | 0.963        | 0.199          |
| 150                 | K           | 0.000                           | 0.995                           | 0.004                           | 1.011        | 0.164          |
| 151                 | T           | 0.032                           | 0.968                           | 0.001                           | 0.973        | 0.175          |
| 152                 | P           | 0.223                           | 0.776                           | 0.000                           | 0.791        | 0.394          |
| 153                 | R           | 0.003                           | 0.984                           | 0.013                           | 1.031        | 0.291          |
| 154                 | G           | 0.904                           | 0.096                           | 0.000                           | 0.147        | 0.279          |
| 155                 | D           | 0.000                           | 0.985                           | 0.015                           | 1.037        | 0.300          |
| 156                 | I           | 0.067                           | 0.932                           | 0.000                           | 0.938        | 0.236          |
| 157                 | E           | 0.066                           | 0.934                           | 0.000                           | 0.939        | 0.231          |
| 158                 | T           | 0.918                           | 0.082                           | 0.000                           | 0.134        | 0.260          |
| 159                 | P           | 0.725                           | 0.275                           | 0.000                           | 0.316        | 0.423          |
| 160                 | N           | 0.038                           | 0.961                           | 0.001                           | 0.968        | 0.198          |
| 161                 | F           | 0.979                           | 0.021                           | 0.000                           | 0.077        | 0.138          |
| 162                 | L           | 0.268                           | 0.731                           | 0.000                           | 0.749        | 0.420          |
| 163                 | F           | 0.025                           | 0.973                           | 0.002                           | 0.983        | 0.184          |
| 164                 | C           | 0.029                           | 0.970                           | 0.001                           | 0.975        | 0.170          |
| 165                 | A           | 0.256                           | 0.744                           | 0.000                           | 0.760        | 0.412          |
| 166                 | T           | 0.964                           | 0.036                           | 0.000                           | 0.091        | 0.178          |
| 167                 | K           | 0.843                           | 0.157                           | 0.000                           | 0.205        | 0.344          |
| 168                 | G           | 0.002                           | 0.994                           | 0.004                           | 1.008        | 0.157          |
| 169                 | C           | 0.000                           | 0.969                           | 0.031                           | 1.076        | 0.430          |
| 170                 | M           | 0.011                           | 0.989                           | 0.000                           | 0.990        | 0.097          |
| 171                 | K           | 0.993                           | 0.007                           | 0.000                           | 0.063        | 0.083          |
| 172                 | S           | 0.000                           | 0.935                           | 0.064                           | 1.161        | 0.616          |
| 173                 | T           | 0.000                           | 0.949                           | 0.050                           | 1.126        | 0.551          |
| 174                 | P           | 0.001                           | 0.991                           | 0.008                           | 1.017        | 0.217          |
| 175                 | I           | 0.003                           | 0.993                           | 0.004                           | 1.008        | 0.168          |
| 176                 | D           | 0.000                           | 0.998                           | 0.002                           | 1.004        | 0.103          |
| 177                 | F           | 0.000                           | 0.985                           | 0.015                           | 1.036        | 0.298          |
| 178                 | I           | 0.001                           | 0.974                           | 0.025                           | 1.060        | 0.389          |
| 179                 | K           | 0.122                           | 0.878                           | 0.000                           | 0.887        | 0.306          |

| Amino acid position | Amino acids | Probability that $\omega < 1.0$ | Probability that $\omega = 1.0$ | Probability that $\omega > 1.0$ | Omega values | Std. deviation |
|---------------------|-------------|---------------------------------|---------------------------------|---------------------------------|--------------|----------------|
| 180                 | K           | 0.000                           | 0.368                           | 0.632                           | 2.609        | 1.244          |
| 181                 | C           | 0.000                           | 0.708                           | 0.292                           | 1.735        | 1.151          |
| 182                 | N           | 0.002                           | 0.998                           | 0.000                           | 0.999        | 0.064          |
| 183                 | T           | 0.000                           | 0.991                           | 0.009                           | 1.022        | 0.236          |
| 184                 | Q           | 0.007                           | 0.993                           | 0.000                           | 0.995        | 0.084          |
| 185                 | V           | 0.044                           | 0.955                           | 0.001                           | 0.962        | 0.208          |
| 186                 | I           | 0.013                           | 0.987                           | 0.000                           | 0.989        | 0.110          |
| 187                 | L           | 0.628                           | 0.371                           | 0.001                           | 0.411        | 0.470          |
| 188                 | S           | 0.001                           | 0.989                           | 0.010                           | 1.024        | 0.250          |
| 189                 | N           | 0.982                           | 0.018                           | 0.000                           | 0.073        | 0.126          |
| 190                 | T           | 0.959                           | 0.041                           | 0.000                           | 0.096        | 0.189          |
| 191                 | F           | 0.065                           | 0.935                           | 0.000                           | 0.940        | 0.230          |
| 192                 | H           | 0.974                           | 0.026                           | 0.000                           | 0.081        | 0.152          |
| 193                 | L           | 0.124                           | 0.873                           | 0.004                           | 0.893        | 0.345          |
| 194                 | L           | 0.000                           | 0.459                           | 0.541                           | 2.375        | 1.279          |
| 195                 | I           | 0.051                           | 0.949                           | 0.001                           | 0.954        | 0.211          |
| 196                 | Q           | 0.011                           | 0.988                           | 0.001                           | 0.993        | 0.128          |
| 197                 | P           | 0.699                           | 0.301                           | 0.000                           | 0.341        | 0.436          |
| 198                 | K           | 0.057                           | 0.943                           | 0.000                           | 0.948        | 0.220          |
| 199                 | P           | 0.000                           | 0.868                           | 0.132                           | 1.331        | 0.851          |
| 200                 | H           | 0.015                           | 0.985                           | 0.000                           | 0.987        | 0.113          |
| 201                 | I           | 0.003                           | 0.990                           | 0.006                           | 1.013        | 0.205          |
| 202                 | I           | 0.019                           | 0.975                           | 0.006                           | 0.997        | 0.228          |
| 203                 | F           | 0.000                           | 0.958                           | 0.042                           | 1.105        | 0.502          |
| 204                 | Q           | 0.001                           | 0.996                           | 0.003                           | 1.006        | 0.138          |
| 205                 | L           | 0.000                           | 0.507                           | 0.493                           | 2.254        | 1.281          |
| 206                 | G           | 0.039                           | 0.960                           | 0.000                           | 0.965        | 0.187          |
| 207                 | G           | 0.855                           | 0.145                           | 0.000                           | 0.193        | 0.333          |
| 208                 | L           | 0.034                           | 0.957                           | 0.009                           | 0.990        | 0.287          |
| 209                 | H           | 0.965                           | 0.035                           | 0.000                           | 0.089        | 0.175          |
| 210                 | K           | 0.000                           | 0.928                           | 0.072                           | 1.180        | 1.000          |
| 211                 | F           | 0.003                           | 0.994                           | 0.003                           | 1.004        | 0.139          |
| 212                 | M           | 0.000                           | 0.985                           | 0.015                           | 1.038        | 0.305          |
| 213                 | N           | 0.033                           | 0.967                           | 0.000                           | 0.971        | 0.168          |
| 214                 | W           | 0.108                           | 0.889                           | 0.003                           | 0.905        | 0.319          |
| 215                 | N           | 0.000                           | 0.153                           | 0.847                           | 3.165        | 0.948          |

| Amino acid position | Amino acids | Probability that $\omega < 1.0$ | Probability that $\omega = 1.0$ | Probability that $\omega > 1.0$ | Omega values | Std. deviation |
|---------------------|-------------|---------------------------------|---------------------------------|---------------------------------|--------------|----------------|
| 216                 | S           | 0.000                           | 0.627                           | 0.373                           | 1.944        | 1.232          |
| 217                 | P           | 0.077                           | 0.922                           | 0.000                           | 0.930        | 0.253          |
| 218                 | I           | 0.070                           | 0.930                           | 0.000                           | 0.936        | 0.243          |
| 219                 | L           | 0.699                           | 0.299                           | 0.001                           | 0.343        | 0.448          |
| 220                 | T           | 0.870                           | 0.130                           | 0.000                           | 0.179        | 0.319          |
| 221                 | D           | 0.972                           | 0.028                           | 0.000                           | 0.083        | 0.158          |
| 222                 | S           | 0.005                           | 0.976                           | 0.019                           | 1.043        | 0.349          |
| 223                 | G           | 0.899                           | 0.101                           | 0.000                           | 0.152        | 0.285          |
| 224                 | G           | 0.921                           | 0.079                           | 0.000                           | 0.131        | 0.256          |
| 225                 | Y           | 0.564                           | 0.436                           | 0.000                           | 0.469        | 0.468          |
| 226                 | Q           | 0.908                           | 0.092                           | 0.000                           | 0.144        | 0.274          |
| 227                 | I           | 0.060                           | 0.940                           | 0.000                           | 0.944        | 0.221          |
| 228                 | F           | 0.273                           | 0.726                           | 0.000                           | 0.744        | 0.422          |
| 229                 | S           | 0.000                           | 0.941                           | 0.059                           | 1.146        | 0.590          |
| 230                 | M           | 0.491                           | 0.509                           | 0.000                           | 0.538        | 0.472          |
| 231                 | S           | 0.000                           | 0.947                           | 0.053                           | 1.131        | 0.560          |
| 232                 | F           | 0.000                           | 0.246                           | 0.754                           | 2.924        | 1.120          |
| 233                 | G           | 0.000                           | 0.977                           | 0.023                           | 1.057        | 0.375          |
| 234                 | S           | 0.001                           | 0.984                           | 0.015                           | 1.038        | 0.307          |
| 235                 | V           | 0.000                           | 0.834                           | 0.166                           | 1.417        | 0.938          |
| 236                 | S           | 0.001                           | 0.988                           | 0.011                           | 1.026        | 0.261          |
| 237                 | N           | 0.000                           | 0.989                           | 0.010                           | 1.025        | 0.250          |
| 238                 | E           | 0.980                           | 0.020                           | 0.000                           | 0.076        | 0.135          |
| 239                 | I           | 0.013                           | 0.987                           | 0.000                           | 0.989        | 0.108          |
| 240                 | K           | 0.047                           | 0.953                           | 0.000                           | 0.958        | 0.202          |
| 241                 | R           | 0.051                           | 0.949                           | 0.000                           | 0.954        | 0.208          |
| 242                 | K           | 0.000                           | 0.984                           | 0.016                           | 1.039        | 0.314          |
| 243                 | C           | 0.002                           | 0.995                           | 0.003                           | 1.004        | 0.135          |
| 244                 | A           | 0.000                           | 0.940                           | 0.060                           | 1.150        | 0.596          |
| 245                 | G           | 0.001                           | 0.891                           | 0.109                           | 1.273        | 0.788          |
| 246                 | T           | 0.000                           | 0.878                           | 0.122                           | 1.308        | 0.829          |
| 247                 | P           | 0.074                           | 0.903                           | 0.022                           | 0.987        | 0.455          |
| 248                 | Q           | 0.162                           | 0.672                           | 0.166                           | 1.270        | 1.078          |
| 249                 | I           | 0.162                           | 0.672                           | 0.166                           | 1.270        | 1.078          |
| 250                 | T           | 0.162                           | 0.672                           | 0.166                           | 1.270        | 1.078          |
| 251                 | K           | 0.162                           | 0.672                           | 0.166                           | 1.270        | 1.078          |

| Amino acid position | Amino acids | Probability that $\omega < 1.0$ | Probability that $\omega = 1.0$ | Probability that $\omega > 1.0$ | Omega values | Std. deviation |
|---------------------|-------------|---------------------------------|---------------------------------|---------------------------------|--------------|----------------|
| 252                 | M           | 0.162                           | 0.672                           | 0.166                           | 1.270        | 1.078          |
| 253                 | S           | 0.162                           | 0.672                           | 0.166                           | 1.270        | 1.078          |
| 254                 | I           | 0.162                           | 0.672                           | 0.166                           | 1.270        | 1.078          |
| 255                 | K           | 0.162                           | 0.672                           | 0.166                           | 1.270        | 1.078          |
| 256                 | N           | 0.000                           | 0.731                           | 0.269                           | 1.679        | 1.125          |
| 257                 | K           | 0.001                           | 0.992                           | 0.008                           | 1.018        | 0.217          |
| 258                 | K           | 0.000                           | 0.098                           | 0.902                           | 3.311        | 0.799          |
| 259                 | K           | 0.000                           | 0.037                           | 0.963                           | 3.469        | 0.546          |
| 260                 | D           | 0.002                           | 0.988                           | 0.010                           | 1.023        | 0.251          |
| 261                 | N           | 0.000                           | 0.869                           | 0.131                           | 1.329        | 0.850          |
| 262                 | L           | 0.000                           | 0.641                           | 0.359                           | 1.911        | 1.226          |
| 263                 | N           | 0.000                           | 0.810                           | 0.190                           | 1.480        | 0.997          |
| 264                 | N           | 0.000                           | 0.835                           | 0.165                           | 1.415        | 0.939          |
| 265                 | E           | 0.000                           | 0.263                           | 0.737                           | 2.883        | 1.146          |
| 266                 | E           | 0.000                           | 0.147                           | 0.853                           | 3.180        | 0.936          |
| 267                 | D           | 0.000                           | 0.986                           | 0.014                           | 1.034        | 0.290          |
| 268                 | Q           | 0.000                           | 0.140                           | 0.860                           | 3.200        | 0.919          |
| 269                 | V           | 0.000                           | 0.154                           | 0.846                           | 3.160        | 0.951          |
| 270                 | N           | 0.000                           | 0.227                           | 0.773                           | 2.971        | 1.088          |
| 271                 | N           | 0.000                           | 0.275                           | 0.725                           | 2.856        | 1.163          |
| 272                 | N           | 0.162                           | 0.672                           | 0.166                           | 1.270        | 1.078          |
| 273                 | F           | 0.162                           | 0.672                           | 0.166                           | 1.270        | 1.078          |
| 274                 | I           | 0.162                           | 0.672                           | 0.166                           | 1.270        | 1.078          |
| 275                 | N           | 0.017                           | 0.972                           | 0.011                           | 1.011        | 0.287          |
| 276                 | N           | 0.000                           | 0.080                           | 0.920                           | 3.357        | 0.740          |
| 277                 | N           | 0.000                           | 0.574                           | 0.426                           | 2.085        | 1.268          |
| 278                 | C           | 0.000                           | 0.812                           | 0.188                           | 1.475        | 0.992          |
| 279                 | E           | 0.001                           | 0.876                           | 0.123                           | 1.311        | 0.834          |
| 280                 | N           | 0.000                           | 0.597                           | 0.403                           | 2.024        | 1.256          |
| 281                 | N           | 0.000                           | 0.475                           | 0.525                           | 2.340        | 1.288          |
| 282                 | M           | 0.000                           | 0.171                           | 0.829                           | 3.121        | 0.993          |
| 283                 | Y           | 0.000                           | 0.085                           | 0.915                           | 3.345        | 0.757          |
| 284                 | N           | 0.015                           | 0.977                           | 0.008                           | 1.005        | 0.246          |
| 285                 | K           | 0.000                           | 0.898                           | 0.102                           | 1.258        | 0.767          |
| 286                 | K           | 0.000                           | 0.826                           | 0.174                           | 1.440        | 0.965          |
| 287                 | G           | 0.000                           | 0.063                           | 0.937                           | 3.401        | 0.674          |



| Amino acid position | Amino acids | Probability that $\omega < 1.0$ | Probability that $\omega = 1.0$ | Probability that $\omega > 1.0$ | Omega values | Std. deviation |
|---------------------|-------------|---------------------------------|---------------------------------|---------------------------------|--------------|----------------|
| 288                 | K           | 0.000                           | 0.466                           | 0.534                           | 2.365        | 1.287          |
| 289                 | C           | 0.000                           | 0.359                           | 0.641                           | 2.639        | 1.243          |
| 290                 | L           | 0.000                           | 0.782                           | 0.218                           | 1.552        | 1.050          |
| 291                 | S           | 0.000                           | 0.145                           | 0.855                           | 3.192        | 0.935          |
| 292                 | N           | 0.023                           | 0.850                           | 0.127                           | 1.300        | 0.868          |
| 293                 | N           | 0.070                           | 0.882                           | 0.048                           | 1.058        | 0.609          |
| 294                 | N           | 0.488                           | 0.493                           | 0.019                           | 0.587        | 0.621          |
| 295                 | N           | 0.023                           | 0.850                           | 0.127                           | 1.300        | 0.868          |
| 296                 | S           | 0.000                           | 0.192                           | 0.808                           | 3.072        | 1.037          |
| 297                 | N           | 0.004                           | 0.880                           | 0.116                           | 1.290        | 0.818          |
| 298                 | N           | 0.015                           | 0.846                           | 0.139                           | 1.338        | 0.893          |
| 299                 | N           | 0.067                           | 0.887                           | 0.045                           | 1.052        | 0.591          |
| 300                 | N           | 0.070                           | 0.882                           | 0.048                           | 1.058        | 0.609          |
| 301                 | N           | 0.003                           | 0.801                           | 0.196                           | 1.495        | 1.017          |
| 302                 | N           | 0.070                           | 0.882                           | 0.048                           | 1.058        | 0.609          |
| 303                 | N           | 0.055                           | 0.860                           | 0.085                           | 1.165        | 0.757          |
| 304                 | N           | 0.002                           | 0.669                           | 0.329                           | 1.837        | 1.209          |
| 305                 | N           | 0.100                           | 0.884                           | 0.016                           | 0.947        | 0.433          |
| 306                 | N           | 0.000                           | 0.556                           | 0.444                           | 2.131        | 1.275          |
| 307                 | S           | 0.000                           | 0.470                           | 0.530                           | 2.349        | 1.280          |
| 308                 | E           | 0.000                           | 0.203                           | 0.797                           | 3.039        | 1.056          |
| 309                 | K           | 0.000                           | 0.193                           | 0.807                           | 3.064        | 1.035          |
| 310                 | S           | 0.006                           | 0.967                           | 0.027                           | 1.061        | 0.413          |
| 311                 | V           | 0.000                           | 0.147                           | 0.853                           | 3.187        | 0.938          |
| 312                 | T           | 0.000                           | 0.494                           | 0.506                           | 2.291        | 1.289          |
| 313                 | D           | 0.000                           | 0.515                           | 0.485                           | 2.235        | 1.285          |
| 314                 | T           | 0.000                           | 0.124                           | 0.876                           | 3.243        | 0.877          |
| 315                 | N           | 0.000                           | 0.416                           | 0.584                           | 2.491        | 1.272          |
| 316                 | N           | 0.000                           | 0.160                           | 0.840                           | 3.155        | 0.970          |
| 317                 | L           | 0.000                           | 0.014                           | 0.986                           | 3.526        | 0.400          |
| 318                 | N           | 0.000                           | 0.895                           | 0.105                           | 1.265        | 0.776          |
| 319                 | K           | 0.000                           | 0.604                           | 0.396                           | 2.003        | 1.246          |
| 320                 | Q           | 0.000                           | 0.587                           | 0.413                           | 2.049        | 1.260          |
| 321                 | I           | 0.000                           | 0.206                           | 0.794                           | 3.030        | 1.060          |
| 322                 | I           | 0.000                           | 0.828                           | 0.172                           | 1.433        | 0.954          |
| 323                 | L           | 0.000                           | 0.616                           | 0.384                           | 1.975        | 1.242          |

| Amino acid position | Amino acids | Probability that $\omega < 1.0$ | Probability that $\omega = 1.0$ | Probability that $\omega > 1.0$ | Omega values | Std. deviation |
|---------------------|-------------|---------------------------------|---------------------------------|---------------------------------|--------------|----------------|
| 324                 | K           | 0.001                           | 0.996                           | 0.003                           | 1.008        | 0.148          |
| 325                 | L           | 0.000                           | 0.469                           | 0.531                           | 2.354        | 1.284          |
| 326                 | N           | 0.000                           | 0.700                           | 0.300                           | 1.763        | 1.172          |
| 327                 | E           | 0.035                           | 0.963                           | 0.002                           | 0.971        | 0.198          |
| 328                 | K           | 0.000                           | 0.931                           | 0.069                           | 1.173        | 0.639          |
| 329                 | G           | 0.005                           | 0.960                           | 0.035                           | 1.084        | 0.469          |
| 330                 | A           | 0.135                           | 0.863                           | 0.003                           | 0.880        | 0.346          |
| 331                 | E           | 0.000                           | 0.262                           | 0.738                           | 2.887        | 1.143          |
| 332                 | Y           | 0.013                           | 0.981                           | 0.006                           | 1.003        | 0.223          |
| 333                 | K           | 0.020                           | 0.971                           | 0.009                           | 1.005        | 0.271          |
| 334                 | S           | 0.004                           | 0.931                           | 0.065                           | 1.161        | 0.625          |
| 335                 | Y           | 0.005                           | 0.970                           | 0.025                           | 1.057        | 0.394          |
| 336                 | Y           | 0.000                           | 0.910                           | 0.090                           | 1.225        | 0.719          |
| 337                 | D           | 0.344                           | 0.655                           | 0.001                           | 0.678        | 0.452          |
| 338                 | G           | 0.005                           | 0.952                           | 0.043                           | 1.102        | 0.513          |
| 339                 | S           | 0.000                           | 0.852                           | 0.147                           | 1.370        | 0.896          |
| 340                 | I           | 0.000                           | 0.027                           | 0.973                           | 3.493        | 0.489          |
| 341                 | D           | 0.005                           | 0.991                           | 0.004                           | 1.007        | 0.177          |
| 342                 | L           | 0.000                           | 0.926                           | 0.074                           | 1.186        | 0.659          |
| 343                 | L           | 0.693                           | 0.303                           | 0.004                           | 0.356        | 0.478          |
| 344                 | S           | 0.000                           | 0.636                           | 0.364                           | 1.921        | 1.225          |
| 345                 | P           | 0.846                           | 0.154                           | 0.000                           | 0.202        | 0.342          |
| 346                 | E           | 0.976                           | 0.024                           | 0.000                           | 0.079        | 0.146          |
| 347                 | S           | 0.000                           | 0.996                           | 0.004                           | 1.010        | 0.154          |
| 348                 | S           | 0.016                           | 0.982                           | 0.003                           | 0.992        | 0.171          |
| 349                 | I           | 0.963                           | 0.037                           | 0.000                           | 0.091        | 0.179          |
| 350                 | Q           | 0.001                           | 0.998                           | 0.001                           | 1.001        | 0.076          |
| 351                 | S           | 0.006                           | 0.993                           | 0.001                           | 0.996        | 0.095          |
| 352                 | Q           | 0.925                           | 0.075                           | 0.000                           | 0.127        | 0.250          |
| 353                 | Y           | 0.013                           | 0.987                           | 0.000                           | 0.989        | 0.109          |
| 354                 | L           | 0.000                           | 0.880                           | 0.119                           | 1.300        | 0.818          |
| 355                 | L           | 0.250                           | 0.748                           | 0.001                           | 0.768        | 0.419          |
| 356                 | G           | 0.890                           | 0.110                           | 0.000                           | 0.160        | 0.297          |
| 357                 | S           | 0.000                           | 0.990                           | 0.010                           | 1.024        | 0.243          |
| 358                 | D           | 0.990                           | 0.010                           | 0.000                           | 0.066        | 0.097          |
| 359                 | F           | 0.682                           | 0.318                           | 0.000                           | 0.357        | 0.439          |

| Amino acid position | Amino acids | Probability that $\omega < 1.0$ | Probability that $\omega = 1.0$ | Probability that $\omega > 1.0$ | Omega values | Std. deviation |
|---------------------|-------------|---------------------------------|---------------------------------|---------------------------------|--------------|----------------|
| 360                 | I           | 0.000                           | 0.975                           | 0.025                           | 1.063        | 0.392          |
| 361                 | L           | 0.079                           | 0.921                           | 0.000                           | 0.927        | 0.250          |
| 362                 | V           | 0.000                           | 0.995                           | 0.005                           | 1.011        | 0.171          |
| 363                 | L           | 0.748                           | 0.252                           | 0.000                           | 0.295        | 0.414          |
| 364                 | D           | 0.990                           | 0.010                           | 0.000                           | 0.066        | 0.097          |
| 365                 | E           | 0.765                           | 0.235                           | 0.000                           | 0.279        | 0.400          |
| 366                 | C           | 0.024                           | 0.973                           | 0.002                           | 0.983        | 0.185          |
| 367                 | T           | 0.039                           | 0.961                           | 0.001                           | 0.966        | 0.190          |
| 368                 | P           | 0.022                           | 0.977                           | 0.001                           | 0.983        | 0.159          |
| 369                 | Y           | 0.000                           | 0.952                           | 0.048                           | 1.120        | 0.537          |
| 370                 | H           | 0.002                           | 0.981                           | 0.017                           | 1.041        | 0.326          |
| 371                 | V           | 0.001                           | 0.997                           | 0.002                           | 1.005        | 0.117          |
| 372                 | D           | 0.000                           | 0.958                           | 0.042                           | 1.104        | 0.500          |
| 373                 | K           | 0.007                           | 0.992                           | 0.001                           | 0.996        | 0.107          |
| 374                 | I           | 0.000                           | 0.825                           | 0.175                           | 1.441        | 0.959          |
| 375                 | Y           | 0.003                           | 0.941                           | 0.056                           | 1.137        | 0.580          |
| 376                 | T           | 0.002                           | 0.991                           | 0.007                           | 1.016        | 0.211          |
| 377                 | E           | 0.986                           | 0.014                           | 0.000                           | 0.070        | 0.114          |
| 378                 | K           | 0.000                           | 0.965                           | 0.035                           | 1.088        | 0.464          |
| 379                 | S           | 0.324                           | 0.676                           | 0.000                           | 0.696        | 0.441          |
| 380                 | M           | 0.000                           | 0.997                           | 0.003                           | 1.008        | 0.141          |
| 381                 | H           | 0.000                           | 0.996                           | 0.004                           | 1.010        | 0.154          |
| 382                 | R           | 0.923                           | 0.077                           | 0.000                           | 0.129        | 0.253          |
| 383                 | S           | 0.001                           | 0.988                           | 0.011                           | 1.026        | 0.262          |
| 384                 | H           | 0.000                           | 0.948                           | 0.052                           | 1.128        | 0.553          |
| 385                 | R           | 0.917                           | 0.083                           | 0.000                           | 0.135        | 0.262          |
| 386                 | W           | 0.700                           | 0.300                           | 0.000                           | 0.340        | 0.435          |
| 387                 | Y           | 0.003                           | 0.986                           | 0.012                           | 1.026        | 0.271          |
| 388                 | V           | 0.000                           | 0.987                           | 0.013                           | 1.031        | 0.278          |
| 389                 | R           | 0.879                           | 0.121                           | 0.000                           | 0.170        | 0.309          |
| 390                 | C           | 0.363                           | 0.637                           | 0.000                           | 0.659        | 0.453          |
| 391                 | L           | 0.012                           | 0.976                           | 0.013                           | 1.020        | 0.295          |
| 392                 | A           | 0.000                           | 0.243                           | 0.757                           | 2.933        | 1.116          |
| 393                 | E           | 0.069                           | 0.931                           | 0.000                           | 0.937        | 0.239          |
| 394                 | F           | 0.007                           | 0.993                           | 0.000                           | 0.995        | 0.090          |
| 395                 | Y           | 0.000                           | 0.026                           | 0.974                           | 3.496        | 0.480          |

| Amino acid position | Amino acids | Probability that $\omega < 1.0$ | Probability that $\omega = 1.0$ | Probability that $\omega > 1.0$ | Omega values | Std. deviation |
|---------------------|-------------|---------------------------------|---------------------------------|---------------------------------|--------------|----------------|
| 396                 | K           | 0.023                           | 0.977                           | 0.000                           | 0.979        | 0.137          |
| 397                 | S           | 0.000                           | 0.988                           | 0.012                           | 1.030        | 0.272          |
| 398                 | Q           | 0.001                           | 0.965                           | 0.034                           | 1.083        | 0.455          |
| 399                 | N           | 0.016                           | 0.964                           | 0.021                           | 1.037        | 0.378          |
| 400                 | M           | 0.857                           | 0.143                           | 0.000                           | 0.192        | 0.332          |
| 401                 | K           | 0.001                           | 0.941                           | 0.059                           | 1.147        | 0.593          |
| 402                 | N           | 0.913                           | 0.087                           | 0.000                           | 0.139        | 0.268          |
| 403                 | Y           | 0.668                           | 0.331                           | 0.001                           | 0.371        | 0.451          |
| 404                 | H           | 0.813                           | 0.187                           | 0.000                           | 0.233        | 0.369          |
| 405                 | E           | 0.000                           | 0.193                           | 0.807                           | 3.067        | 1.040          |
| 406                 | Y           | 0.668                           | 0.331                           | 0.001                           | 0.371        | 0.451          |
| 407                 | L           | 0.493                           | 0.499                           | 0.008                           | 0.555        | 0.540          |
| 408                 | N           | 0.781                           | 0.218                           | 0.000                           | 0.263        | 0.394          |
| 409                 | D           | 0.000                           | 0.629                           | 0.371                           | 1.943        | 1.237          |
| 410                 | I           | 0.062                           | 0.924                           | 0.014                           | 0.977        | 0.377          |
| 411                 | Y           | 0.119                           | 0.876                           | 0.004                           | 0.899        | 0.348          |
| 412                 | N           | 0.899                           | 0.100                           | 0.000                           | 0.151        | 0.287          |
| 413                 | K           | 0.832                           | 0.167                           | 0.000                           | 0.215        | 0.356          |
| 414                 | K           | 0.857                           | 0.143                           | 0.000                           | 0.192        | 0.334          |
| 415                 | Y           | 0.668                           | 0.331                           | 0.001                           | 0.371        | 0.451          |
| 416                 | K           | 0.249                           | 0.749                           | 0.002                           | 0.771        | 0.423          |
| 417                 | T           | 0.003                           | 0.849                           | 0.148                           | 1.372        | 0.904          |
| 418                 | N           | 0.016                           | 0.970                           | 0.015                           | 1.023        | 0.327          |
| 419                 | D           | 0.000                           | 0.310                           | 0.690                           | 2.763        | 1.200          |
| 420                 | K           | 0.000                           | 0.626                           | 0.374                           | 1.952        | 1.240          |
| 421                 | W           | 0.425                           | 0.567                           | 0.007                           | 0.617        | 0.528          |
| 422                 | I           | 0.000                           | 0.815                           | 0.184                           | 1.466        | 0.985          |
| 423                 | K           | 0.229                           | 0.770                           | 0.002                           | 0.790        | 0.411          |
| 424                 | R           | 0.022                           | 0.936                           | 0.042                           | 1.084        | 0.527          |
| 425                 | D           | 0.192                           | 0.806                           | 0.002                           | 0.823        | 0.385          |
| 426                 | K           | 0.005                           | 0.931                           | 0.065                           | 1.160        | 0.628          |
| 427                 | N           | 0.003                           | 0.997                           | 0.000                           | 0.998        | 0.054          |
| 428                 | N           | 0.259                           | 0.741                           | 0.000                           | 0.758        | 0.410          |
| 429                 | Q           | 0.935                           | 0.065                           | 0.000                           | 0.118        | 0.234          |
| 430                 | A           | 0.000                           | 0.996                           | 0.004                           | 1.009        | 0.151          |
| 431                 | I           | 0.010                           | 0.972                           | 0.018                           | 1.036        | 0.347          |

| Amino acid position | Amino acids | Probability that $\omega < 1.0$ | Probability that $\omega = 1.0$ | Probability that $\omega > 1.0$ | Omega values | Std. deviation |
|---------------------|-------------|---------------------------------|---------------------------------|---------------------------------|--------------|----------------|
| 432                 | Y           | 0.642                           | 0.358                           | 0.000                           | 0.395        | 0.452          |
| 433                 | G           | 0.305                           | 0.695                           | 0.000                           | 0.714        | 0.434          |
| 434                 | I           | 0.967                           | 0.033                           | 0.000                           | 0.088        | 0.171          |
| 435                 | I           | 0.038                           | 0.961                           | 0.001                           | 0.967        | 0.196          |
| 436                 | Q           | 0.935                           | 0.065                           | 0.000                           | 0.118        | 0.234          |
| 437                 | G           | 0.938                           | 0.062                           | 0.000                           | 0.115        | 0.229          |
| 438                 | G           | 0.002                           | 0.993                           | 0.004                           | 1.008        | 0.167          |
| 439                 | I           | 0.030                           | 0.969                           | 0.001                           | 0.976        | 0.179          |
| 440                 | Y           | 0.000                           | 0.988                           | 0.012                           | 1.029        | 0.269          |
| 441                 | P           | 0.000                           | 0.985                           | 0.014                           | 1.035        | 0.295          |
| 442                 | D           | 0.000                           | 0.992                           | 0.007                           | 1.018        | 0.214          |
| 443                 | L           | 0.776                           | 0.224                           | 0.000                           | 0.268        | 0.398          |
| 444                 | R           | 0.896                           | 0.104                           | 0.000                           | 0.154        | 0.290          |
| 445                 | L           | 0.000                           | 0.006                           | 0.994                           | 3.546        | 0.331          |
| 446                 | K           | 0.000                           | 0.806                           | 0.194                           | 1.491        | 1.005          |
| 447                 | S           | 0.043                           | 0.956                           | 0.001                           | 0.962        | 0.200          |
| 448                 | C           | 0.000                           | 0.928                           | 0.072                           | 1.180        | 0.648          |
| 449                 | D           | 0.000                           | 0.931                           | 0.069                           | 1.172        | 0.634          |
| 450                 | F           | 0.000                           | 0.994                           | 0.006                           | 1.014        | 0.188          |
| 451                 | V           | 0.001                           | 0.998                           | 0.001                           | 1.002        | 0.089          |
| 452                 | Y           | 0.000                           | 0.900                           | 0.100                           | 1.249        | 0.750          |
| 453                 | N           | 0.282                           | 0.718                           | 0.000                           | 0.736        | 0.422          |
| 454                 | L           | 0.000                           | 0.627                           | 0.373                           | 1.943        | 1.230          |
| 455                 | P           | 0.001                           | 0.989                           | 0.009                           | 1.022        | 0.242          |
| 456                 | F           | 0.000                           | 0.996                           | 0.003                           | 1.008        | 0.145          |
| 457                 | F           | 0.000                           | 0.983                           | 0.017                           | 1.042        | 0.322          |
| 458                 | G           | 0.850                           | 0.150                           | 0.000                           | 0.198        | 0.338          |
| 459                 | L           | 0.004                           | 0.979                           | 0.017                           | 1.039        | 0.327          |
| 460                 | C           | 0.021                           | 0.978                           | 0.001                           | 0.983        | 0.156          |
| 461                 | I           | 0.981                           | 0.019                           | 0.000                           | 0.074        | 0.130          |
| 462                 | G           | 0.909                           | 0.091                           | 0.000                           | 0.142        | 0.272          |
| 463                 | G           | 0.934                           | 0.066                           | 0.000                           | 0.118        | 0.235          |
| 464                 | C           | 0.002                           | 0.963                           | 0.036                           | 1.087        | 0.465          |
| 465                 | L           | 0.000                           | 0.986                           | 0.013                           | 1.033        | 0.285          |
| 466                 | G           | 0.925                           | 0.075                           | 0.000                           | 0.127        | 0.249          |
| 467                 | K           | 0.005                           | 0.994                           | 0.001                           | 0.998        | 0.100          |

| Amino acid position | Amino acids | Probability that $\omega < 1.0$ | Probability that $\omega = 1.0$ | Probability that $\omega > 1.0$ | Omega values | Std. deviation |
|---------------------|-------------|---------------------------------|---------------------------------|---------------------------------|--------------|----------------|
| 468                 | D           | 0.069                           | 0.931                           | 0.000                           | 0.937        | 0.239          |
| 469                 | K           | 0.000                           | 0.995                           | 0.005                           | 1.012        | 0.175          |
| 470                 | D           | 0.015                           | 0.985                           | 0.000                           | 0.987        | 0.114          |
| 471                 | M           | 0.000                           | 0.991                           | 0.009                           | 1.021        | 0.229          |
| 472                 | M           | 0.000                           | 0.999                           | 0.001                           | 1.003        | 0.083          |
| 473                 | Y           | 0.568                           | 0.432                           | 0.000                           | 0.465        | 0.467          |
| 474                 | A           | 0.000                           | 0.848                           | 0.152                           | 1.380        | 0.903          |
| 475                 | V           | 0.000                           | 0.767                           | 0.233                           | 1.587        | 1.070          |
| 476                 | I           | 0.007                           | 0.993                           | 0.000                           | 0.995        | 0.081          |
| 477                 | K           | 0.073                           | 0.927                           | 0.000                           | 0.933        | 0.244          |
| 478                 | Q           | 0.000                           | 0.705                           | 0.295                           | 1.744        | 1.155          |
| 479                 | T           | 0.000                           | 0.880                           | 0.120                           | 1.301        | 0.819          |
| 480                 | M           | 0.001                           | 0.998                           | 0.002                           | 1.003        | 0.100          |
| 481                 | D           | 0.000                           | 0.188                           | 0.812                           | 3.078        | 1.027          |
| 482                 | I           | 0.000                           | 0.911                           | 0.089                           | 1.224        | 0.715          |
| 483                 | I           | 0.000                           | 0.831                           | 0.169                           | 1.425        | 0.946          |
| 484                 | H           | 0.000                           | 0.798                           | 0.201                           | 1.507        | 1.014          |
| 485                 | D           | 0.000                           | 0.538                           | 0.462                           | 2.176        | 1.279          |
| 486                 | I           | 0.001                           | 0.965                           | 0.034                           | 1.083        | 0.455          |
| 487                 | K           | 0.000                           | 0.016                           | 0.984                           | 3.522        | 0.414          |
| 488                 | K           | 0.000                           | 0.866                           | 0.134                           | 1.337        | 0.862          |
| 489                 | K           | 0.000                           | 0.739                           | 0.261                           | 1.663        | 1.121          |
| 490                 | K           | 0.001                           | 0.924                           | 0.075                           | 1.188        | 0.670          |
| 491                 | E           | 0.000                           | 0.800                           | 0.200                           | 1.504        | 1.012          |
| 492                 | K           | 0.174                           | 0.822                           | 0.005                           | 0.849        | 0.398          |
| 493                 | N           | 0.000                           | 0.240                           | 0.760                           | 2.943        | 1.113          |
| 494                 | T           | 0.000                           | 0.756                           | 0.244                           | 1.614        | 1.086          |
| 495                 | Y           | 0.000                           | 0.636                           | 0.364                           | 1.918        | 1.219          |
| 496                 | K           | 0.000                           | 0.007                           | 0.993                           | 3.544        | 0.340          |
| 497                 | E           | 0.000                           | 0.991                           | 0.009                           | 1.023        | 0.238          |
| 498                 | K           | 0.994                           | 0.006                           | 0.000                           | 0.062        | 0.075          |
| 499                 | P           | 0.834                           | 0.166                           | 0.000                           | 0.213        | 0.352          |
| 500                 | I           | 0.013                           | 0.982                           | 0.005                           | 1.001        | 0.205          |
| 501                 | H           | 0.556                           | 0.444                           | 0.000                           | 0.476        | 0.468          |
| 502                 | L           | 0.004                           | 0.963                           | 0.033                           | 1.079        | 0.451          |
| 503                 | L           | 0.324                           | 0.676                           | 0.000                           | 0.696        | 0.441          |

| Amino acid position | Amino acids | Probability that $\omega < 1.0$ | Probability that $\omega = 1.0$ | Probability that $\omega > 1.0$ | Omega values | Std. deviation |
|---------------------|-------------|---------------------------------|---------------------------------|---------------------------------|--------------|----------------|
| 504                 | G           | 0.928                           | 0.072                           | 0.000                           | 0.125        | 0.245          |
| 505                 | I           | 0.660                           | 0.340                           | 0.000                           | 0.379        | 0.447          |
| 506                 | G           | 0.876                           | 0.124                           | 0.000                           | 0.173        | 0.312          |
| 507                 | Q           | 0.054                           | 0.946                           | 0.000                           | 0.950        | 0.211          |
| 508                 | I           | 0.004                           | 0.992                           | 0.003                           | 1.004        | 0.154          |
| 509                 | K           | 0.001                           | 0.996                           | 0.003                           | 1.005        | 0.132          |
| 510                 | D           | 0.920                           | 0.080                           | 0.000                           | 0.133        | 0.258          |
| 511                 | I           | 0.082                           | 0.918                           | 0.000                           | 0.925        | 0.257          |
| 512                 | I           | 0.000                           | 0.986                           | 0.014                           | 1.034        | 0.292          |
| 513                 | Y           | 0.001                           | 0.990                           | 0.008                           | 1.020        | 0.230          |
| 514                 | G           | 0.035                           | 0.964                           | 0.000                           | 0.968        | 0.178          |
| 515                 | V           | 0.454                           | 0.546                           | 0.000                           | 0.573        | 0.470          |
| 516                 | K           | 0.000                           | 0.862                           | 0.138                           | 1.347        | 0.871          |
| 517                 | Q           | 0.009                           | 0.945                           | 0.046                           | 1.106        | 0.535          |
| 518                 | G           | 0.858                           | 0.142                           | 0.000                           | 0.190        | 0.330          |
| 519                 | I           | 0.005                           | 0.993                           | 0.003                           | 1.002        | 0.139          |
| 520                 | D           | 0.983                           | 0.017                           | 0.000                           | 0.072        | 0.124          |
| 521                 | T           | 0.537                           | 0.463                           | 0.000                           | 0.495        | 0.470          |
| 522                 | F           | 0.905                           | 0.095                           | 0.000                           | 0.146        | 0.278          |
| 523                 | D           | 0.994                           | 0.006                           | 0.000                           | 0.062        | 0.078          |
| 524                 | C           | 0.883                           | 0.117                           | 0.000                           | 0.167        | 0.305          |
| 525                 | V           | 0.898                           | 0.102                           | 0.000                           | 0.152        | 0.286          |
| 526                 | I           | 0.004                           | 0.992                           | 0.003                           | 1.005        | 0.157          |
| 527                 | P           | 0.200                           | 0.799                           | 0.000                           | 0.813        | 0.380          |
| 528                 | S           | 0.001                           | 0.991                           | 0.007                           | 1.016        | 0.212          |
| 529                 | R           | 0.880                           | 0.120                           | 0.000                           | 0.169        | 0.308          |
| 530                 | L           | 0.020                           | 0.978                           | 0.002                           | 0.987        | 0.170          |
| 531                 | A           | 0.928                           | 0.072                           | 0.000                           | 0.124        | 0.244          |
| 532                 | R           | 0.847                           | 0.153                           | 0.000                           | 0.201        | 0.342          |
| 533                 | H           | 0.128                           | 0.872                           | 0.000                           | 0.881        | 0.311          |
| 534                 | G           | 0.839                           | 0.161                           | 0.000                           | 0.208        | 0.348          |
| 535                 | Y           | 0.038                           | 0.962                           | 0.001                           | 0.966        | 0.184          |
| 536                 | F           | 0.002                           | 0.993                           | 0.006                           | 1.012        | 0.187          |
| 537                 | L           | 0.226                           | 0.773                           | 0.001                           | 0.791        | 0.403          |
| 538                 | S           | 0.000                           | 0.996                           | 0.004                           | 1.009        | 0.151          |
| 539                 | K           | 0.013                           | 0.965                           | 0.022                           | 1.043        | 0.384          |

| Amino acid position | Amino acids | Probability that $\omega < 1.0$ | Probability that $\omega = 1.0$ | Probability that $\omega > 1.0$ | Omega values | Std. deviation |
|---------------------|-------------|---------------------------------|---------------------------------|---------------------------------|--------------|----------------|
| 540                 | I           | 0.010                           | 0.969                           | 0.021                           | 1.042        | 0.370          |
| 541                 | K           | 0.208                           | 0.787                           | 0.005                           | 0.816        | 0.424          |
| 542                 | T           | 0.684                           | 0.315                           | 0.000                           | 0.355        | 0.444          |
| 543                 | I           | 0.812                           | 0.188                           | 0.000                           | 0.235        | 0.373          |
| 544                 | E           | 0.001                           | 0.961                           | 0.038                           | 1.095        | 0.484          |
| 545                 | T           | 0.000                           | 0.398                           | 0.602                           | 2.537        | 1.263          |
| 546                 | I           | 0.004                           | 0.947                           | 0.049                           | 1.120        | 0.549          |
| 547                 | E           | 0.830                           | 0.170                           | 0.000                           | 0.217        | 0.356          |
| 548                 | K           | 0.007                           | 0.954                           | 0.039                           | 1.093        | 0.499          |
| 549                 | K           | 0.872                           | 0.128                           | 0.000                           | 0.177        | 0.317          |
| 550                 | L           | 0.340                           | 0.627                           | 0.033                           | 0.763        | 0.677          |
| 551                 | K           | 0.000                           | 0.737                           | 0.263                           | 1.666        | 1.121          |
| 552                 | R           | 0.011                           | 0.980                           | 0.009                           | 1.011        | 0.252          |
| 553                 | K           | 0.013                           | 0.976                           | 0.011                           | 1.016        | 0.282          |
| 554                 | L           | 0.160                           | 0.836                           | 0.004                           | 0.860        | 0.382          |
| 555                 | Q           | 0.000                           | 0.992                           | 0.008                           | 1.019        | 0.217          |
| 556                 | N           | 0.000                           | 0.171                           | 0.829                           | 3.120        | 0.992          |
| 557                 | E           | 0.426                           | 0.574                           | 0.000                           | 0.599        | 0.466          |
| 558                 | Y           | 0.000                           | 0.990                           | 0.010                           | 1.025        | 0.250          |
| 559                 | I           | 0.000                           | 0.906                           | 0.094                           | 1.235        | 0.735          |
| 560                 | K           | 0.015                           | 0.985                           | 0.000                           | 0.987        | 0.119          |
| 561                 | I           | 0.007                           | 0.991                           | 0.002                           | 0.999        | 0.136          |
| 562                 | K           | 0.001                           | 0.990                           | 0.009                           | 1.022        | 0.241          |
| 563                 | L           | 0.000                           | 0.215                           | 0.785                           | 3.004        | 1.073          |
| 564                 | S           | 0.002                           | 0.998                           | 0.000                           | 0.999        | 0.065          |
| 565                 | I           | 0.000                           | 0.956                           | 0.043                           | 1.108        | 0.512          |
| 566                 | F           | 0.004                           | 0.995                           | 0.001                           | 0.999        | 0.096          |
| 567                 | Q           | 0.000                           | 0.995                           | 0.005                           | 1.013        | 0.177          |
| 568                 | S           | 0.000                           | 0.704                           | 0.296                           | 1.745        | 1.155          |
| 569                 | D           | 0.896                           | 0.104                           | 0.000                           | 0.155        | 0.289          |
| 570                 | N           | 0.000                           | 0.974                           | 0.026                           | 1.065        | 0.399          |
| 571                 | Q           | 0.000                           | 0.459                           | 0.541                           | 2.374        | 1.277          |
| 572                 | P           | 0.020                           | 0.979                           | 0.001                           | 0.985        | 0.151          |
| 573                 | L           | 0.182                           | 0.805                           | 0.013                           | 0.860        | 0.469          |
| 574                 | E           | 0.613                           | 0.387                           | 0.000                           | 0.422        | 0.459          |
| 575                 | E           | 0.000                           | 0.889                           | 0.111                           | 1.278        | 0.790          |



| Amino acid position | Amino acids | Probability that $\omega < 1.0$ | Probability that $\omega = 1.0$ | Probability that $\omega > 1.0$ | Omega values | Std. deviation |
|---------------------|-------------|---------------------------------|---------------------------------|---------------------------------|--------------|----------------|
| 576                 | D           | 0.000                           | 0.533                           | 0.467                           | 2.191        | 1.284          |
| 577                 | C           | 0.873                           | 0.127                           | 0.000                           | 0.176        | 0.315          |
| 578                 | A           | 0.000                           | 0.927                           | 0.073                           | 1.181        | 0.651          |
| 579                 | C           | 0.766                           | 0.234                           | 0.000                           | 0.277        | 0.401          |
| 580                 | Y           | 0.000                           | 0.926                           | 0.074                           | 1.184        | 0.655          |
| 581                 | T           | 0.047                           | 0.953                           | 0.000                           | 0.958        | 0.200          |
| 582                 | C           | 0.874                           | 0.126                           | 0.000                           | 0.175        | 0.314          |
| 583                 | Q           | 0.000                           | 0.024                           | 0.976                           | 3.501        | 0.472          |
| 584                 | H           | 0.001                           | 0.997                           | 0.001                           | 1.002        | 0.092          |
| 585                 | Y           | 0.000                           | 0.995                           | 0.005                           | 1.012        | 0.175          |
| 586                 | S           | 0.002                           | 0.994                           | 0.004                           | 1.008        | 0.164          |
| 587                 | R           | 0.190                           | 0.809                           | 0.001                           | 0.825        | 0.379          |
| 588                 | A           | 0.034                           | 0.965                           | 0.000                           | 0.969        | 0.175          |
| 589                 | Y           | 0.005                           | 0.995                           | 0.001                           | 0.997        | 0.083          |
| 590                 | L           | 0.813                           | 0.186                           | 0.000                           | 0.233        | 0.370          |
| 591                 | H           | 0.595                           | 0.405                           | 0.000                           | 0.440        | 0.463          |
| 592                 | H           | 0.000                           | 0.992                           | 0.008                           | 1.020        | 0.220          |
| 593                 | L           | 0.000                           | 0.932                           | 0.068                           | 1.169        | 0.630          |
| 594                 | Y           | 0.000                           | 0.976                           | 0.024                           | 1.058        | 0.377          |
| 595                 | K           | 0.001                           | 0.997                           | 0.002                           | 1.003        | 0.106          |
| 596                 | I           | 0.020                           | 0.980                           | 0.000                           | 0.982        | 0.131          |
| 597                 | N           | 0.000                           | 0.915                           | 0.085                           | 1.214        | 0.704          |
| 598                 | D           | 0.000                           | 0.985                           | 0.015                           | 1.038        | 0.307          |
| 599                 | N           | 0.000                           | 0.996                           | 0.004                           | 1.010        | 0.162          |
| 600                 | L           | 0.000                           | 0.964                           | 0.036                           | 1.089        | 0.464          |
| 601                 | L           | 0.000                           | 0.541                           | 0.459                           | 2.163        | 1.273          |
| 602                 | G           | 0.000                           | 0.966                           | 0.034                           | 1.084        | 0.453          |
| 603                 | T           | 0.185                           | 0.813                           | 0.001                           | 0.829        | 0.377          |
| 604                 | L           | 0.168                           | 0.828                           | 0.004                           | 0.853        | 0.391          |
| 605                 | L           | 0.013                           | 0.980                           | 0.007                           | 1.005        | 0.230          |
| 606                 | T           | 0.001                           | 0.994                           | 0.005                           | 1.010        | 0.171          |
| 607                 | I           | 0.000                           | 0.868                           | 0.132                           | 1.331        | 0.853          |
| 608                 | H           | 0.312                           | 0.688                           | 0.000                           | 0.707        | 0.436          |
| 609                 | N           | 0.997                           | 0.003                           | 0.000                           | 0.059        | 0.057          |
| 610                 | V           | 0.003                           | 0.994                           | 0.003                           | 1.005        | 0.146          |
| 611                 | Y           | 0.000                           | 0.903                           | 0.097                           | 1.244        | 0.744          |

| Amino acid position | Amino acids | Probability that $\omega < 1.0$ | Probability that $\omega = 1.0$ | Probability that $\omega > 1.0$ | Omega values | Std. deviation |
|---------------------|-------------|---------------------------------|---------------------------------|---------------------------------|--------------|----------------|
| 612                 | Y           | 0.935                           | 0.065                           | 0.000                           | 0.117        | 0.233          |
| 613                 | M           | 0.023                           | 0.977                           | 0.000                           | 0.980        | 0.145          |
| 614                 | N           | 0.006                           | 0.991                           | 0.003                           | 1.001        | 0.151          |
| 615                 | H           | 0.000                           | 0.313                           | 0.687                           | 2.749        | 1.196          |
| 616                 | L           | 0.753                           | 0.246                           | 0.000                           | 0.290        | 0.413          |
| 617                 | M           | 0.010                           | 0.990                           | 0.000                           | 0.991        | 0.093          |
| 618                 | Q           | 0.000                           | 0.942                           | 0.058                           | 1.145        | 0.587          |
| 619                 | D           | 0.000                           | 0.945                           | 0.055                           | 1.138        | 0.573          |
| 620                 | I           | 0.000                           | 0.986                           | 0.013                           | 1.033        | 0.288          |
| 621                 | R           | 0.735                           | 0.265                           | 0.000                           | 0.307        | 0.421          |
| 622                 | N           | 0.000                           | 0.074                           | 0.926                           | 3.372        | 0.713          |
| 623                 | S           | 0.000                           | 0.981                           | 0.019                           | 1.047        | 0.340          |
| 624                 | I           | 0.979                           | 0.021                           | 0.000                           | 0.076        | 0.136          |
| 625                 | K           | 0.000                           | 0.001                           | 0.999                           | 3.560        | 0.272          |
| 626                 | E           | 0.000                           | 0.016                           | 0.984                           | 3.520        | 0.416          |
| 627                 | G           | 0.006                           | 0.994                           | 0.000                           | 0.996        | 0.084          |
| 628                 | N           | 0.000                           | 0.630                           | 0.370                           | 1.941        | 1.236          |
| 629                 | I           | 0.000                           | 0.985                           | 0.015                           | 1.038        | 0.304          |
| 630                 | N           | 0.000                           | 0.990                           | 0.010                           | 1.024        | 0.246          |
| 631                 | Q           | 0.000                           | 0.968                           | 0.032                           | 1.079        | 0.438          |
| 632                 | I           | 0.004                           | 0.994                           | 0.002                           | 1.002        | 0.131          |
| 633                 | E           | 0.002                           | 0.991                           | 0.007                           | 1.016        | 0.212          |
| 634                 | Q           | 0.000                           | 0.539                           | 0.461                           | 2.166        | 1.268          |
| 635                 | K           | 0.000                           | 0.827                           | 0.173                           | 1.435        | 0.955          |
| 636                 | Y           | 0.000                           | 0.865                           | 0.135                           | 1.339        | 0.860          |
| 637                 | I           | 0.005                           | 0.993                           | 0.002                           | 1.000        | 0.118          |
| 638                 | K           | 0.000                           | 0.230                           | 0.770                           | 2.966        | 1.097          |
| 639                 | K           | 0.000                           | 0.023                           | 0.977                           | 3.505        | 0.460          |
