# Supplementary material
Source: publisher figshare collection journal article supplement (https://tandf.figshare.com/articles/dataset/_/1569868)
Supplement: Supplementary file 3 [file 1]

Archive with 12 entries (12 files):
- tbsd_a_1040074_sm1574.pdf
- tbsd_a_1040074_sm9472.tif
- tbsd_a_1040074_sm9471.tif
- tbsd_a_1040074_sm9470.tif
- tbsd_a_1040074_sm9469.tif
- tbsd_a_1040074_sm9468.tif
- tbsd_a_1040074_sm9467.tif
- tbsd_a_1040074_sm9466.pdf
- tbsd_a_1040074_sm9465.pdf
- tbsd_a_1040074_sm9464.pdf
- tbsd_a_1040074_sm9463.pdf
- tbsd_a_1040074_sm9462.pdf
