# Supplementary material
Source: publisher figshare collection journal article supplement (https://tandf.figshare.com/articles/dataset/_/1569868)
Supplement: Supplementary file 3 [file 1 › tbsd_a_1040074_sm9462.pdf]

Table S1. The structure of compounds that were docked against *P. falciparum* apicoplast and human TGT proteins

| Sr No | Compound | Structure                                                                            |
|-------|----------|--------------------------------------------------------------------------------------|
| 1     | preQ1    | 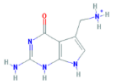    |
| 2     | Queuine  | 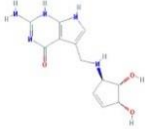    |
| 3     | 13493864 | 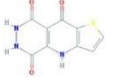    |
| 4     | 44199330 | 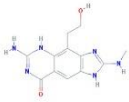   |
| 5     | 44542871 | 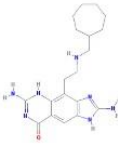  |
| 6     | 44543022 | 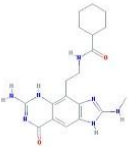  |
| 7     | 57339810 | 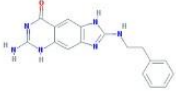 |
