# Supplementary material
Source: publisher figshare collection journal article supplement (https://tandf.figshare.com/articles/dataset/_/1569868)
Supplement: Supplementary file 3 [file 1 › tbsd_a_1040074_sm9463.pdf]

| Modification                     | Common Name                                            | Modifying enzymes                                                 | PlasmoDB ID                                                                                                                                                                     |
|----------------------------------|--------------------------------------------------------|-------------------------------------------------------------------|---------------------------------------------------------------------------------------------------------------------------------------------------------------------------------|
| m <sup>1</sup> A                 | 1-methyladenosine                                      | tRNA methyltransferase                                            | PF3D7_0925200                                                                                                                                                                   |
| m <sup>6</sup> A                 | N <sup>6</sup> -methyladenosine                        | tRNA (adenine-N(6))-methyltransferase                             | PF3D7_0729500,<br>PF3D7_1235500                                                                                                                                                 |
| i <sup>6</sup> A                 | N <sup>6</sup> -isopentenyladenosine                   | tRNA (adenosine(37)-N6)-dimethylallyltransferase                  | PF3D7_1207600                                                                                                                                                                   |
| m <sup>3</sup> C                 | 3-methylcytidine                                       | 3-methylcytidine transferase                                      | PF3D7_1248100                                                                                                                                                                   |
| m <sup>4</sup> <sub>2</sub> Cm   | N <sup>4</sup> ,N <sup>4</sup> ,2'-O-trimethylcytidine | RNA small subunit methyltransferase H                             | PF3D7_1236700                                                                                                                                                                   |
| m <sup>1</sup> G                 | 1-methylguanosine                                      | tRNA(m(1)G37)methyltransferase                                    | PF3D7_0914300                                                                                                                                                                   |
| Gm                               | 2'-O-methylguanosine                                   | tRNA (guanosine(18)-2'-O)-methyltransferase                       | PF3D7_0908600,<br>PF3D7_1429400                                                                                                                                                 |
| m <sup>2</sup> <sub>2</sub> G    | N2,N2-dimethylguanosine                                | tRNA (guanine(10)-N2)-dimethyltransferase                         | PF3D7_1319300                                                                                                                                                                   |
| imG-14                           | 4-demethylwyosine                                      | S-adenosyl-L-methionine-dependent tRNA 4-demethylwyosine synthase | PF3D7_0524900                                                                                                                                                                   |
| Q                                | Queuosine                                              | queueine tRNA- ribosyl transferase1                               | PF3D7_0717400,<br>PF3D7_1434100                                                                                                                                                 |
| preQ1                            | 7-aminomethyl-7-deazaguanosine                         | tRNA guanosine(34) transglycosylase                               | PF3D7_1242200                                                                                                                                                                   |
| ψ                                | Pseudouridine                                          | pseudouridine synthase                                            | PF3D7_0219500,<br>PF3D7_0516300,<br>PF3D7_0730100,<br>PF3D7_0804600,<br>PF3D7_0908700,<br>PF3D7_1018000,<br>PF3D7_1035000,<br>PF3D7_1417500,<br>PF3D7_0511500,<br>PF3D7_0914000 |
| D                                | dihydrouridine                                         | dihydrouridine synthase                                           | PF3D7_0918800,<br>PF3D7_1408900                                                                                                                                                 |
| m <sup>5</sup> U                 | 5-methyluridine                                        | Methylenetetrahydrofolate-tRNA-(uracil-54)-methyltransferase      | PF3D7_1133800                                                                                                                                                                   |
| nm <sup>5</sup> S <sup>2</sup> U | 5-aminomethyl-2-thiouridine                            | tRNA (5-methylaminomethyl-2-thiouridylate)-methyltransferase      | PF3D7_1244000                                                                                                                                                                   |
| ncm <sup>5</sup> Um              | 5-carboxymethyl-2'-O-methyluridine                     | tRNA (cytidine(34)-2'-O)-methyltransferase                        | PF3D7_0817100                                                                                                                                                                   |
| S <sup>2</sup> U                 | 2-thiouridine                                          | tRNA-specific 2-thiouridylase 1                                   | PF3D7_1019800                                                                                                                                                                   |
| m <sup>5</sup> C                 | 5-methylcytidine                                       | tRNA (cytosine(38)-C(5))-methyltransferase                        | PF3D7_0704200                                                                                                                                                                   |
| Am                               | 2'-O-methyladenosine                                   | tRNA-2'-O-methyltransferase                                       | PF3D7_1130600                                                                                                                                                                   |
| ms <sup>2</sup> i <sup>6</sup> A | 2-methylthio-N6-isopentenyladenosine                   | tRNA (N6-isopentenyladenosine(37)-C2)-methylthiotransferase       | PF3D7_0622200                                                                                                                                                                   |

|                                 |                               |                                                            |               |
|---------------------------------|-------------------------------|------------------------------------------------------------|---------------|
| t <sup>6</sup> A                | N6-threonylcarbamoyladenosine | threonyl<br>carbamoyladenosine<br>synthetase               | PF3D7_1203500 |
| m <sup>2</sup> A                | 2-methyladenosine             | 2-methyladenosine<br>transferase                           | PF3D7_1406900 |
| I                               | Inosine                       | Adenosine deaminase<br>acting on tRNA 2                    | PF3D7_1349400 |
| I                               | Inosine                       | Adenosine deaminase<br>acting on tRNA 3                    | PF3D7_1204600 |
| m <sup>1</sup> ψ                | 1-methylpseudouridine         | 1-methylpseudouridine<br>transferase                       | PF3D7_0821500 |
| Cm                              | 2'-O-methylcytidine           | 2'-O-methylcytidine<br>transferase                         | PF3D7_1130600 |
| K <sup>2</sup> C                | 2-lysidine                    | tRNA lysidine(34)<br>synthetase                            | PF3D7_0411200 |
| yW                              | wybutosine                    | Leucine carboxyl<br>methyltransferase 2                    | PF3D7_1439700 |
| yW                              | wybutosine                    | S-adenosyl-L-methionine-<br>dependent<br>methyltransferase | PF3D7_1018500 |
| m <sup>2</sup> <sub>2,7</sub> G | N2,N2,7-trimethylguanosine    | Trimethylguanosine<br>synthase 1                           | PF3D7_1202500 |
| m <sup>7</sup> G                | 7-methylguanosine             | tRNA (guanine-N(7))-<br>methyltransferase                  | PF3D7_1127300 |

---
