# Supplementary material
Source: publisher figshare collection journal article supplement (https://tandf.figshare.com/articles/dataset/_/1569868)
Supplement: Supplementary file 3 [file 1 › tbsd_a_1040074_sm9464.pdf]

*P. falciparum* proteins that are predicted to be interact with QTRT1

| Query         | Subject       | Function                                 |
|---------------|---------------|------------------------------------------|
| PF3D7_0717400 | PF3D7_1434100 | queuine tRNA-ribosyltransferase          |
| PF3D7_0717400 | PF3D7_0524900 | tRNA-YW synthesizing protein             |
| PF3D7_0717400 | PF3D7_1408900 | tRNA-dihydrouridine synthase             |
| PF3D7_0717400 | PF3D7_1207600 | tRNA delta(2)-isopentenylpyrophosphate   |
| PF3D7_0717400 | PF3D7_1331700 | glutamine-tRNA ligase                    |
| PF3D7_0717400 | PF3D7_1005000 | methionine-tRNA ligase                   |
| PF3D7_0717400 | PF3D7_1336900 | tryptophan-tRNA ligase                   |
| PF3D7_0717400 | PF3D7_1120500 | tRNA nucleotidyltransferase              |
| PF3D7_0717400 | PF3D7_1315700 | 1-methyladenosine tRNA methyltransferase |
| PF3D7_0717400 | PF3D7_1229100 | ABC transporter                          |
| PF3D7_0717400 | PF3D7_0407200 | peptidyl-tRNA hydrolase PTH2             |
| PF3D7_0717400 | PF3D7_0804600 | U2 snRNA/tRNA pseudouridine synthase     |
| PF3D7_0717400 | PF3D7_1407500 | tRNA m2G10 methyltransferase subunit     |
| PF3D7_0717400 | PF3D7_1359000 | conserved Plasmodium protein             |
| PF3D7_0717400 | PF3D7_1473500 | conserved Plasmodium protein             |
| PF3D7_0717400 | PF3D7_1233400 | conserved Plasmodium protein             |
| PF3D7_0717400 | PF3D7_1425900 | conserved Plasmodium protein             |
| PF3D7_0717400 | PF3D7_0530700 | conserved Plasmodium protein             |
| PF3D7_0717400 | PF3D7_1208100 | conserved Plasmodium protein             |
| PF3D7_0717400 | PF3D7_0206300 | conserved Plasmodium protein             |
| PF3D7_0717400 | PF3D7_1450600 | conserved Plasmodium protein             |
| PF3D7_0717400 | PF3D7_1128500 | conserved Plasmodium protein             |
| PF3D7_0717400 | PF3D7_1130600 | conserved Plasmodium protein             |
| PF3D7_0717400 | PF3D7_1467200 | conserved Plasmodium protein             |
| PF3D7_0717400 | PF3D7_0405000 | ATP-dependent RNA helicase               |
| PF3D7_0717400 | PF3D7_0516200 | 40S ribosomal protein S14                |
| PF3D7_0717400 | PF3D7_1329000 | DNA-directed RNA polymerase 3 largest    |
| PF3D7_0717400 | PF3D7_1020700 | ribosomal processing ATPase              |
| PF3D7_0717400 | PF3D7_0908600 | ribosomal RNA methyltransferase          |
| PF3D7_0717400 | PF3D7_0408300 | zinc finger, RNA binding protein         |
| PF3D7_0717400 | PF3D7_1417500 | pseudouridine synthase                   |
| PF3D7_0717400 | PF3D7_1317800 | 40S ribosomal protein S15/S19            |
| PF3D7_0717400 | PF3D7_0528700 | peptidyl-prolyl cis-trans isomerase      |
| PF3D7_0717400 | PF3D7_1331800 | 60S ribosomal protein L23                |
| PF3D7_0717400 | PF3D7_1465900 | 40S ribosomal protein S3                 |
| PF3D7_0717400 | PF3D7_1129400 | RNA methyltransferase                    |
| PF3D7_0717400 | PF3D7_1216200 | glycerol-3-phosphate dehydrogenase       |
| PF3D7_0717400 | PF3D7_1327800 | ribose-phosphate pyrophosphokinase       |
| PF3D7_0717400 | PF3D7_1121700 | protein GCN20                            |
| PF3D7_0717400 | PF3D7_1423200 | peptidyl-prolyl cis-trans isomerase      |
| PF3D7_0717400 | PF3D7_0727200 | cysteine desulfurase                     |
| PF3D7_0717400 | PF3D7_0109500 | N-acetyltransferase                      |
| PF3D7_0717400 | PF3D7_1407100 | fibrillarin                              |
| PF3D7_0717400 | PF3D7_1009000 | diphthine synthase                       |
| PF3D7_0717400 | PF3D7_1429000 | protein archease                         |
| PF3D7_0717400 | PF3D7_1332800 | translation initiation factor 6          |
| PF3D7_0717400 | PF3D7_1441200 | 60S ribosomal protein L1                 |
| PF3D7_0717400 | PF3D7_0708300 | O-sialoglycoprotein endopeptidase        |
| PF3D7_0717400 | PF3D7_0509400 | RNA polymerase I                         |

|               |               |                                             |
|---------------|---------------|---------------------------------------------|
| PF3D7_0717400 | PF3D7_1143300 | DNA-directed RNA polymerase I               |
| PF3D7_0717400 | PF3D7_1434000 | CCR4-associated factor 16                   |
| PF3D7_0717400 | PF3D7_0722100 | PelOta protein homologue                    |
| PF3D7_0717400 | PF3D7_0721300 | DEAD/DEAH box ATP-dependent RNA             |
| PF3D7_0717400 | PF3D7_0520000 | 40S ribosomal protein S9                    |
| PF3D7_0717400 | PF3D7_1445900 | DEAD/DEAH box ATP-dependent RNA             |
| PF3D7_0717400 | PF3D7_0923000 | DNA-directed RNA polymerase II              |
| PF3D7_0717400 | PF3D7_1428300 | proliferation-associated protein 2g4        |
| PF3D7_0717400 | PF3D7_1364800 | DNA-directed RNA polymerase 2               |
| PF3D7_0717400 | PF3D7_1434600 | methionine aminopeptidase 2                 |
| PF3D7_0717400 | PF3D7_0529500 | cell cycle regulator protein                |
| PF3D7_0717400 | PF3D7_1342000 | 40S ribosomal protein S6                    |
| PF3D7_0717400 | PF3D7_1118500 | box C/D snoRNP rRNA 2'-O-methylation factor |
| PF3D7_0717400 | PF3D7_0524400 | cytosolic preribosomal GTP-binding protein  |
| PF3D7_0717400 | PF3D7_1351400 | 60S ribosomal protein L17                   |
| PF3D7_0717400 | PF3D7_1415800 | small subunit rRNA dimethylase              |
| PF3D7_0717400 | PF3D7_1116300 | peptidyl-prolyl cis-trans isomerase         |
| PF3D7_0717400 | PF3D7_1410200 | cytidine triphosphate synthetase            |
| PF3D7_0717400 | PF3D7_1332400 | nucleotidyltransferase                      |
| PF3D7_0717400 | PF3D7_1115300 | cysteine proteinase falcipain 2b            |
| PF3D7_0717400 | PF3D7_1243800 | microtubule associated katanin              |
| PF3D7_0717400 | PF3D7_1333600 | U3 snoRNA-associated small subunit rRNA     |

---

*P. falciparum* proteins that are predicted to interact with QTRTD1

| Query         | Subject       | Function                                                              |
|---------------|---------------|-----------------------------------------------------------------------|
| PF3D7_1434100 | PF3D7_0717400 | queuine tRNA-ribosyltransferase                                       |
| PF3D7_1434100 | PF3D7_0804600 | U2 snRNA/tRNA pseudouridine synthase                                  |
| PF3D7_1434100 | PF3D7_1248100 | methyltransferase                                                     |
| PF3D7_1434100 | PF3D7_1407500 | tRNA m2G10 methyltransferase subunit                                  |
| PF3D7_1434100 | PF3D7_1111000 | tRNA m5C-methyltransferase                                            |
| PF3D7_1434100 | PF3D7_1315700 | 1-methyladenosine tRNA methyltransferase subunit                      |
| PF3D7_1434100 | PF3D7_0709600 | rRNA/tRNA ribonuclease MRP/P subunit                                  |
| PF3D7_1434100 | PF3D7_0524900 | tRNA-YW synthesizing protein                                          |
| PF3D7_1434100 | PF3D7_1130600 | conserved Plasmodium protein                                          |
| PF3D7_1434100 | PF3D7_1408500 | conserved Plasmodium protein                                          |
| PF3D7_1434100 | PF3D7_1135800 | conserved Plasmodium protein                                          |
| PF3D7_1434100 | PF3D7_1323900 | conserved Plasmodium protein                                          |
| PF3D7_1434100 | PF3D7_0530700 | conserved Plasmodium protein                                          |
| PF3D7_1434100 | PF3D7_1425900 | conserved Plasmodium protein                                          |
| PF3D7_1434100 | PF3D7_1473500 | conserved Plasmodium protein                                          |
| PF3D7_1434100 | PF3D7_1467200 | conserved Plasmodium protein                                          |
| PF3D7_1434100 | PF3D7_1411500 | conserved Plasmodium protein                                          |
| PF3D7_1434100 | PF3D7_1450600 | conserved Plasmodium protein                                          |
| PF3D7_1434100 | PF3D7_0208300 | conserved Plasmodium protein                                          |
| PF3D7_1434100 | PF3D7_1111200 | conserved Plasmodium protein                                          |
| PF3D7_1434100 | PF3D7_0913300 | conserved Plasmodium protein                                          |
| PF3D7_1434100 | PF3D7_0801500 | conserved Plasmodium protein                                          |
| PF3D7_1434100 | PF3D7_1128500 | conserved Plasmodium protein                                          |
| PF3D7_1434100 | PF3D7_1006600 | phosducin-like protein                                                |
| PF3D7_1434100 | PF3D7_1332400 | nucleotidyltransferase                                                |
| PF3D7_1434100 | PF3D7_0908600 | ribosomal RNA methyltransferase                                       |
| PF3D7_1434100 | PF3D7_1367600 | ribosome biogenesis protein MRT4                                      |
| PF3D7_1434100 | PF3D7_1432500 | RNA methyltransferase                                                 |
| PF3D7_1434100 | PF3D7_0807100 | RNA helicase                                                          |
| PF3D7_1434100 | PF3D7_0921800 | nucleolar preribosomal assembly protein                               |
| PF3D7_1434100 | PF3D7_0917700 | XPA binding protein 1                                                 |
| PF3D7_1434100 | PF3D7_1471000 | RNA 3'-terminal phosphate cyclase-like protein                        |
| PF3D7_1434100 | PF3D7_0612900 | nucleolar GTP-binding protein 1                                       |
| PF3D7_1434100 | PF3D7_0612800 | 6-cysteine protein                                                    |
| PF3D7_1434100 | PF3D7_1301400 | Plasmodium exported protein                                           |
| PF3D7_1434100 | PF3D7_1206600 | DNA-directed RNA polymerase III subunit                               |
| PF3D7_1434100 | PF3D7_1333600 | U3 snoRNA-associated small subunit rRNA processing associated protein |
| PF3D7_1434100 | PF3D7_0811500 | histone-arginine methyltransferase                                    |
| PF3D7_1434100 | PF3D7_1115300 | cysteine proteinase falcipain 2b                                      |
| PF3D7_1434100 | PF3D7_1206600 | DEAD/DEAH box ATP-dependent RNA helicase                              |
| PF3D7_1434100 | PF3D7_1009000 | diphthine synthase                                                    |
| PF3D7_1434100 | PF3D7_1116300 | peptidyl-prolyl cis-trans isomerase                                   |
| PF3D7_1434100 | PF3D7_1402700 | pre-mRNA splicing factor                                              |
| PF3D7_1434100 | PF3D7_1009200 | small subunit rRNA synthesis-associated protein                       |
| PF3D7_1434100 | PF3D7_1020700 | ribosomal processing ATPase                                           |
| PF3D7_1434100 | PF3D7_1332800 | translation initiation factor 6                                       |

|               |               |                                                   |
|---------------|---------------|---------------------------------------------------|
| PF3D7_1434100 | PF3D7_0502800 | DnaJ protein                                      |
| PF3D7_1434100 | PF3D7_1410200 | cytidine triphosphate synthetase                  |
| PF3D7_1434100 | PF3D7_0923200 | flavodoxin-like protein                           |
| PF3D7_1434100 | PF3D7_1415200 | DNA-directed RNA polymerase I/III subunit         |
| PF3D7_1434100 | PF3D7_1143300 | DNA-directed RNA polymerase I                     |
| PF3D7_1434100 | PF3D7_0801000 | Plasmodium exported protein                       |
| PF3D7_1434100 | PF3D7_0708300 | O-sialoglycoprotein endopeptidase                 |
| PF3D7_1434100 | PF3D7_1461200 | U3 small nucleolar ribonucleoprotein protein IMP3 |
| PF3D7_1434100 | PF3D7_1146000 | nucleolar preribosomal assembly protein           |
| PF3D7_1434100 | PF3D7_1415800 | small subunit rRNA dimethylase                    |

---

Proteins involved in transcriptional/translational process are depicted in pink, while conserved proteins are highlighted in green
