# Supplementary material
Source: publisher figshare collection journal article supplement (https://tandf.figshare.com/articles/dataset/_/1569868)
Supplement: Supplementary file 3 [file 1 › tbsd_a_1040074_sm9466.pdf]

The distance (in Å) between important amino acids of different TGT proteins and various ligands

| <i>P. falciparum</i> TGT | Asp 221 | Gly 223 | Tyr 225 | Asp 364 | Cys 366 | Leu 503 |
|--------------------------|---------|---------|---------|---------|---------|---------|
| preQ1                    | 3.0     | 4.7     | 3.9     | 3.0     | 3.4     | 4.6     |
| Q                        | 3.7     | 6.1     | 6.5     | 3.1     | ND      | 3.3     |
| CID_44199330             | 3.8     | 5.2     | 5.3     | 3.1     | 3.4     | 3.8     |
| CID_44542871             | 2.7     | 4.9     | 5.3     | 2.9     | 3.6     | 3.9     |
| CID_44543022             | 3.9     | 4.3     | 5.5     | 2.0     | 4.0     | 3.3     |
| CID_57339810             | 2.4     | 4.5     | 6.1     | 3.7     | 3.4     | 3.7     |
| Zinc 13493864            | 2.5     | 4.9     | 6.6     | 3.4     | 4.9     | 3.2     |
| <i>H. sapiens</i> TGT    | Asp 60  | Gly 62  | Phe 64  | Asp 114 | Val 116 | Leu 213 |
| preQ1                    | 2.2     | 4.6     | 4.1     | 6.4     | 3.7     | 6.9     |
| Q                        | 2.9     | 4.4     | 5.3     | 2.5     | 3.7     | 7.1     |
| CID_44199330             | 3.4     | 6.8     | 4.8     | 4.0     | 3.4     | 9.2     |
| CID_44542871             | 2.3     | 5.4     | 3.9     | 5.2     | 2.8     | 7.4     |
| CID_44543022             | 2.6     | 7.8     | 4.2     | 4.3     | 10.3    | 9.3     |
| CID_57339810             | 2.8     | 8.0     | 3.4     | 3.1     | 3       | 5.4     |
| Zinc 13493864            | 2.3     | 5.2     | 4.2     | 4.9     | 4.7     | 7.9     |
| <i>Z. mobilis</i> TGT    | Asp 102 | Gly 104 | Tyr 106 | Asp 156 | Cys 158 | Met 260 |
| preQ1                    | 2.1     | 7.5     | 5.2     | 7.4     | 6.8     | 2.5     |
| Q                        | 3.4     | 6.3     | 6.4     | 9.0     | 7.5     | 4.9     |

ND: Not Detected
