# Supplementary material
Source: publisher figshare collection journal article supplement (https://tandf.figshare.com/articles/dataset/_/1569868)

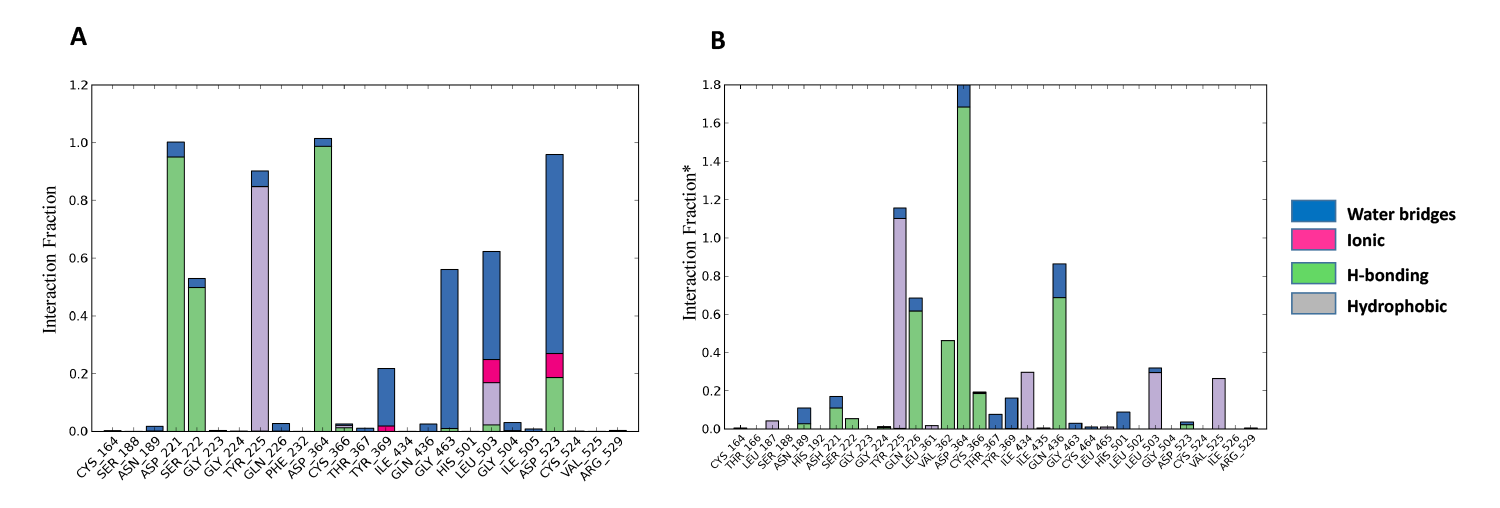

Supplement: Supplementary file 3 [file 1 › tbsd_a_1040074_sm9472.tif]

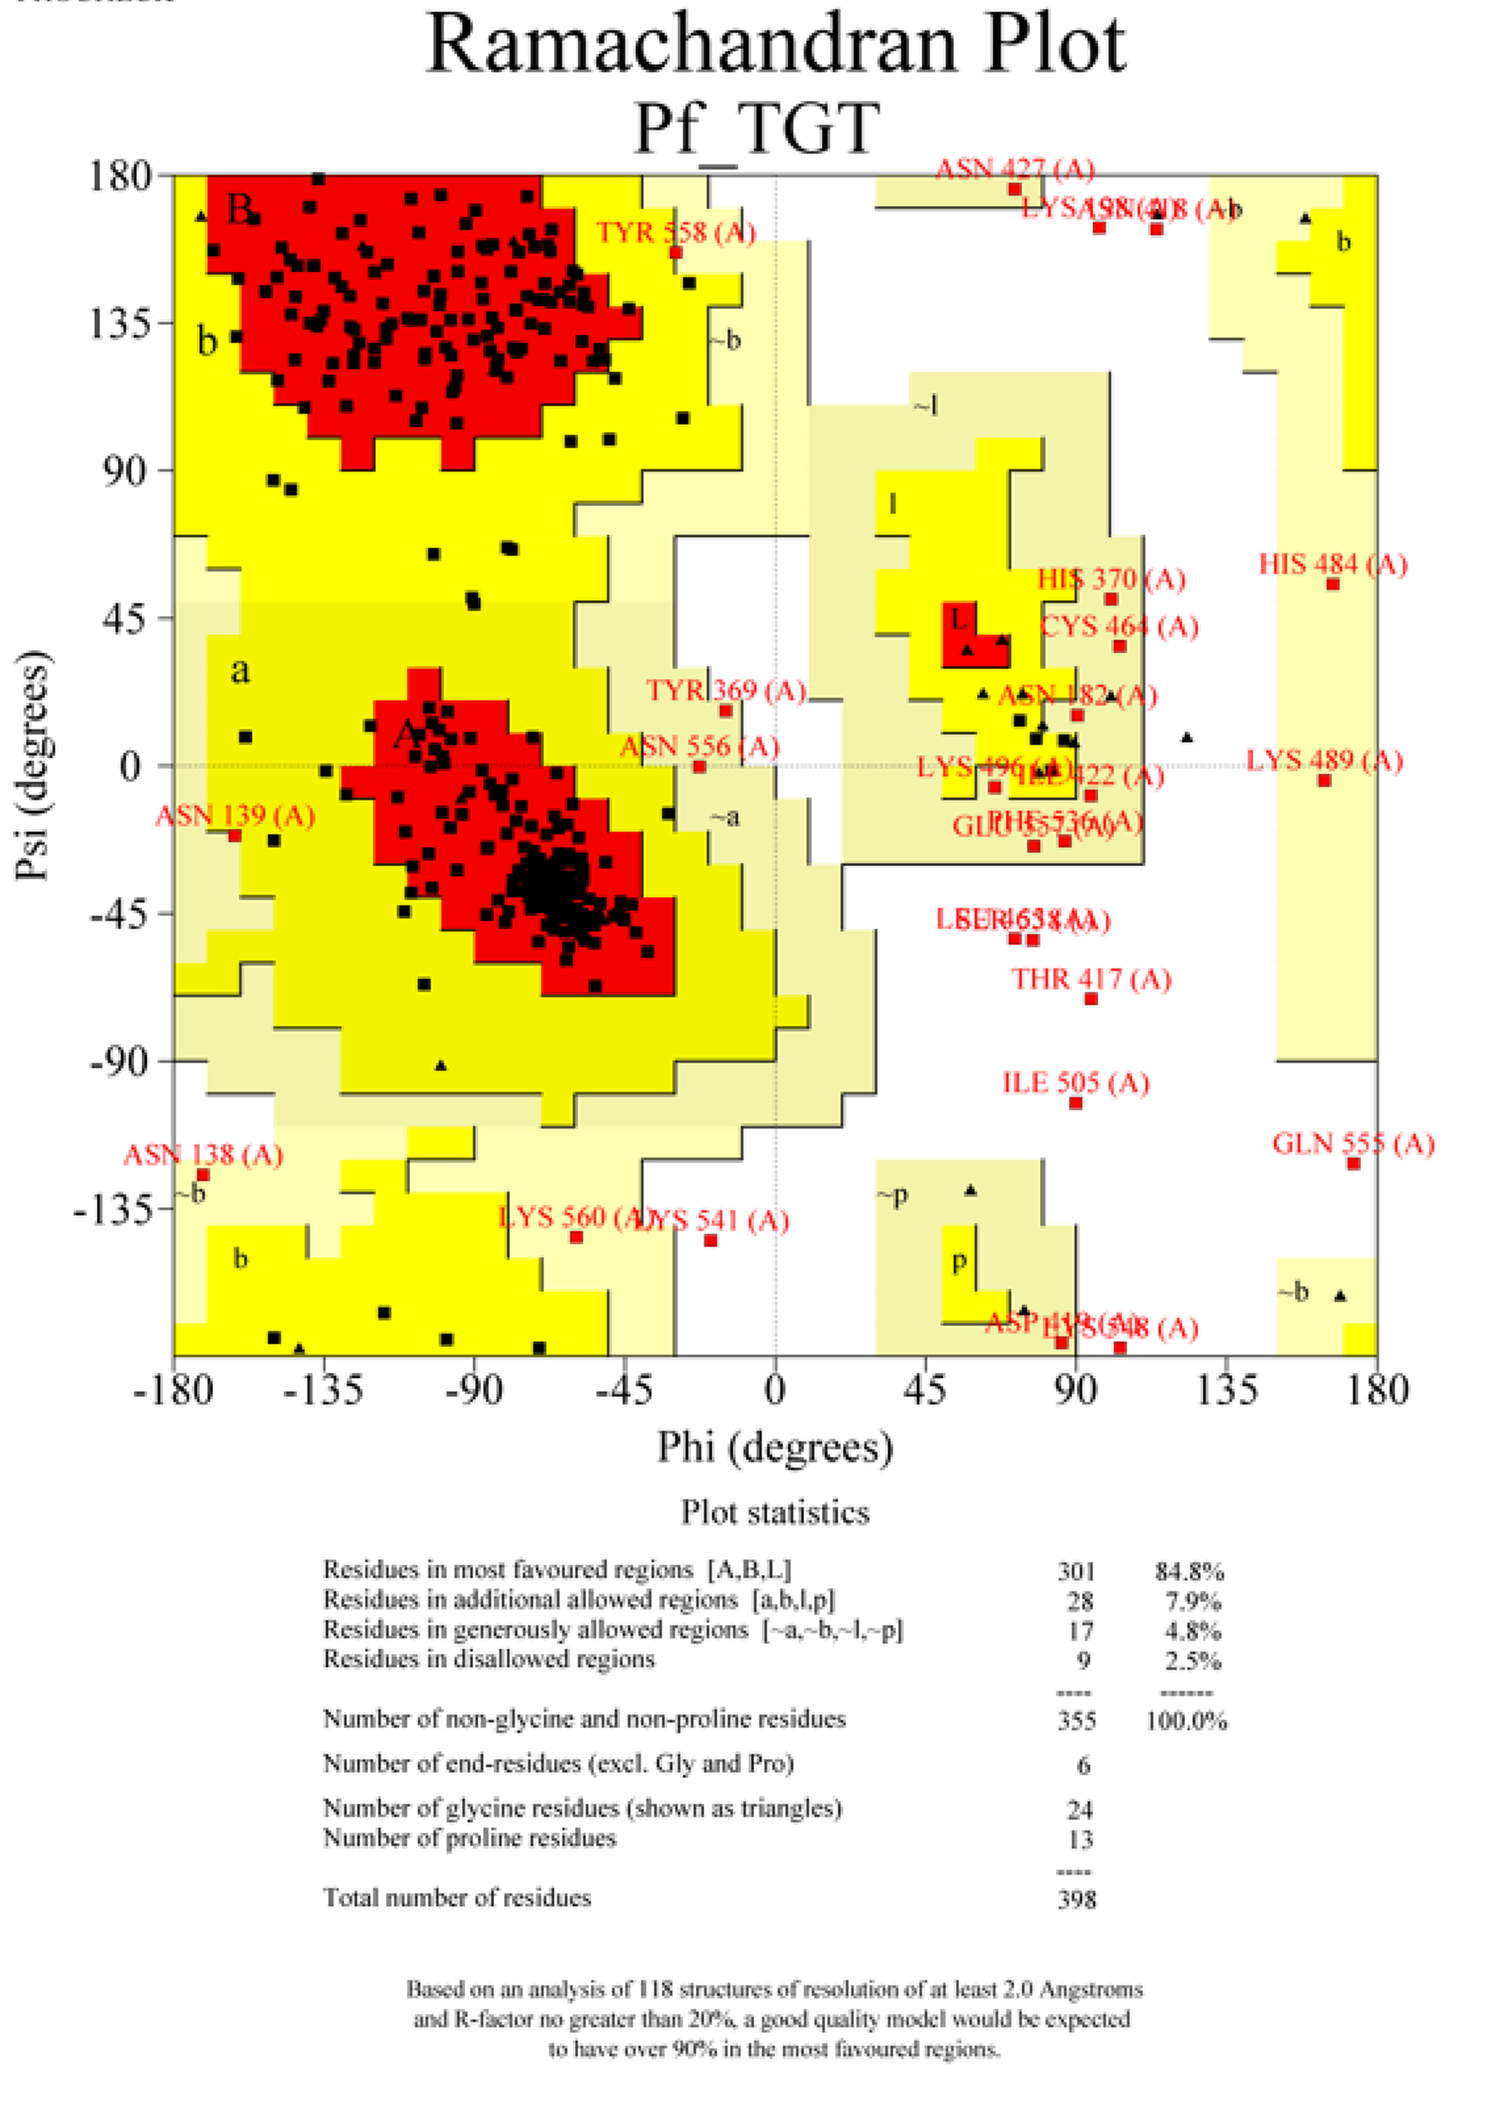

Supplement: Supplementary file 3 [file 1 › tbsd_a_1040074_sm9471.tif]

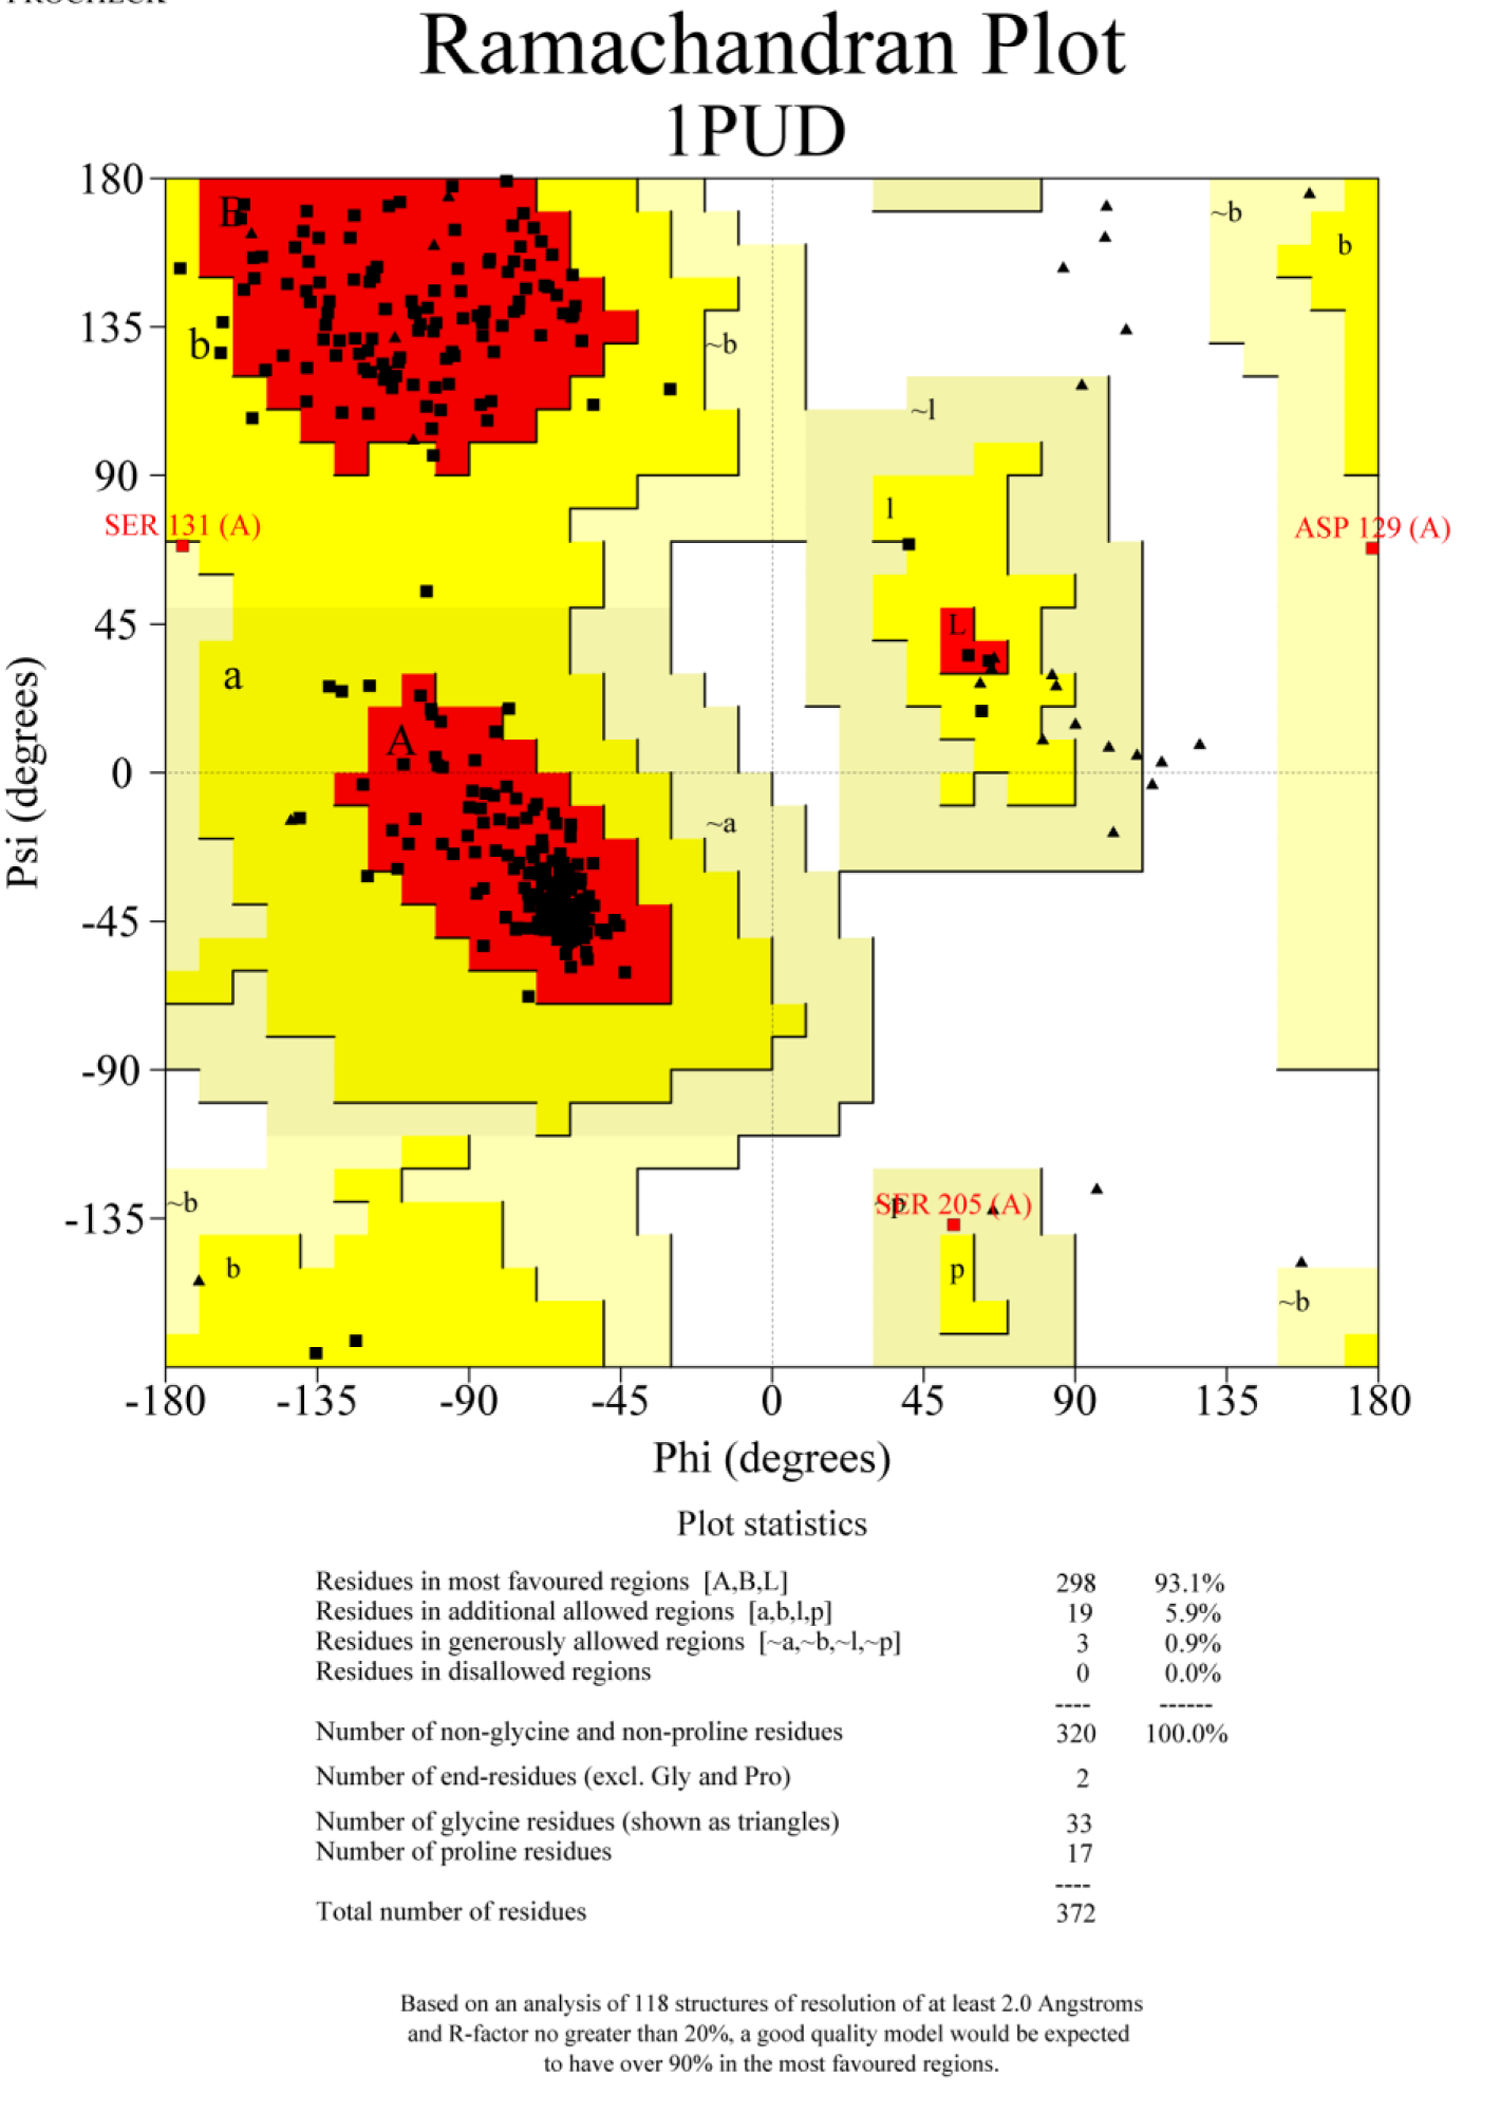

Supplement: Supplementary file 3 [file 1 › tbsd_a_1040074_sm9470.tif]

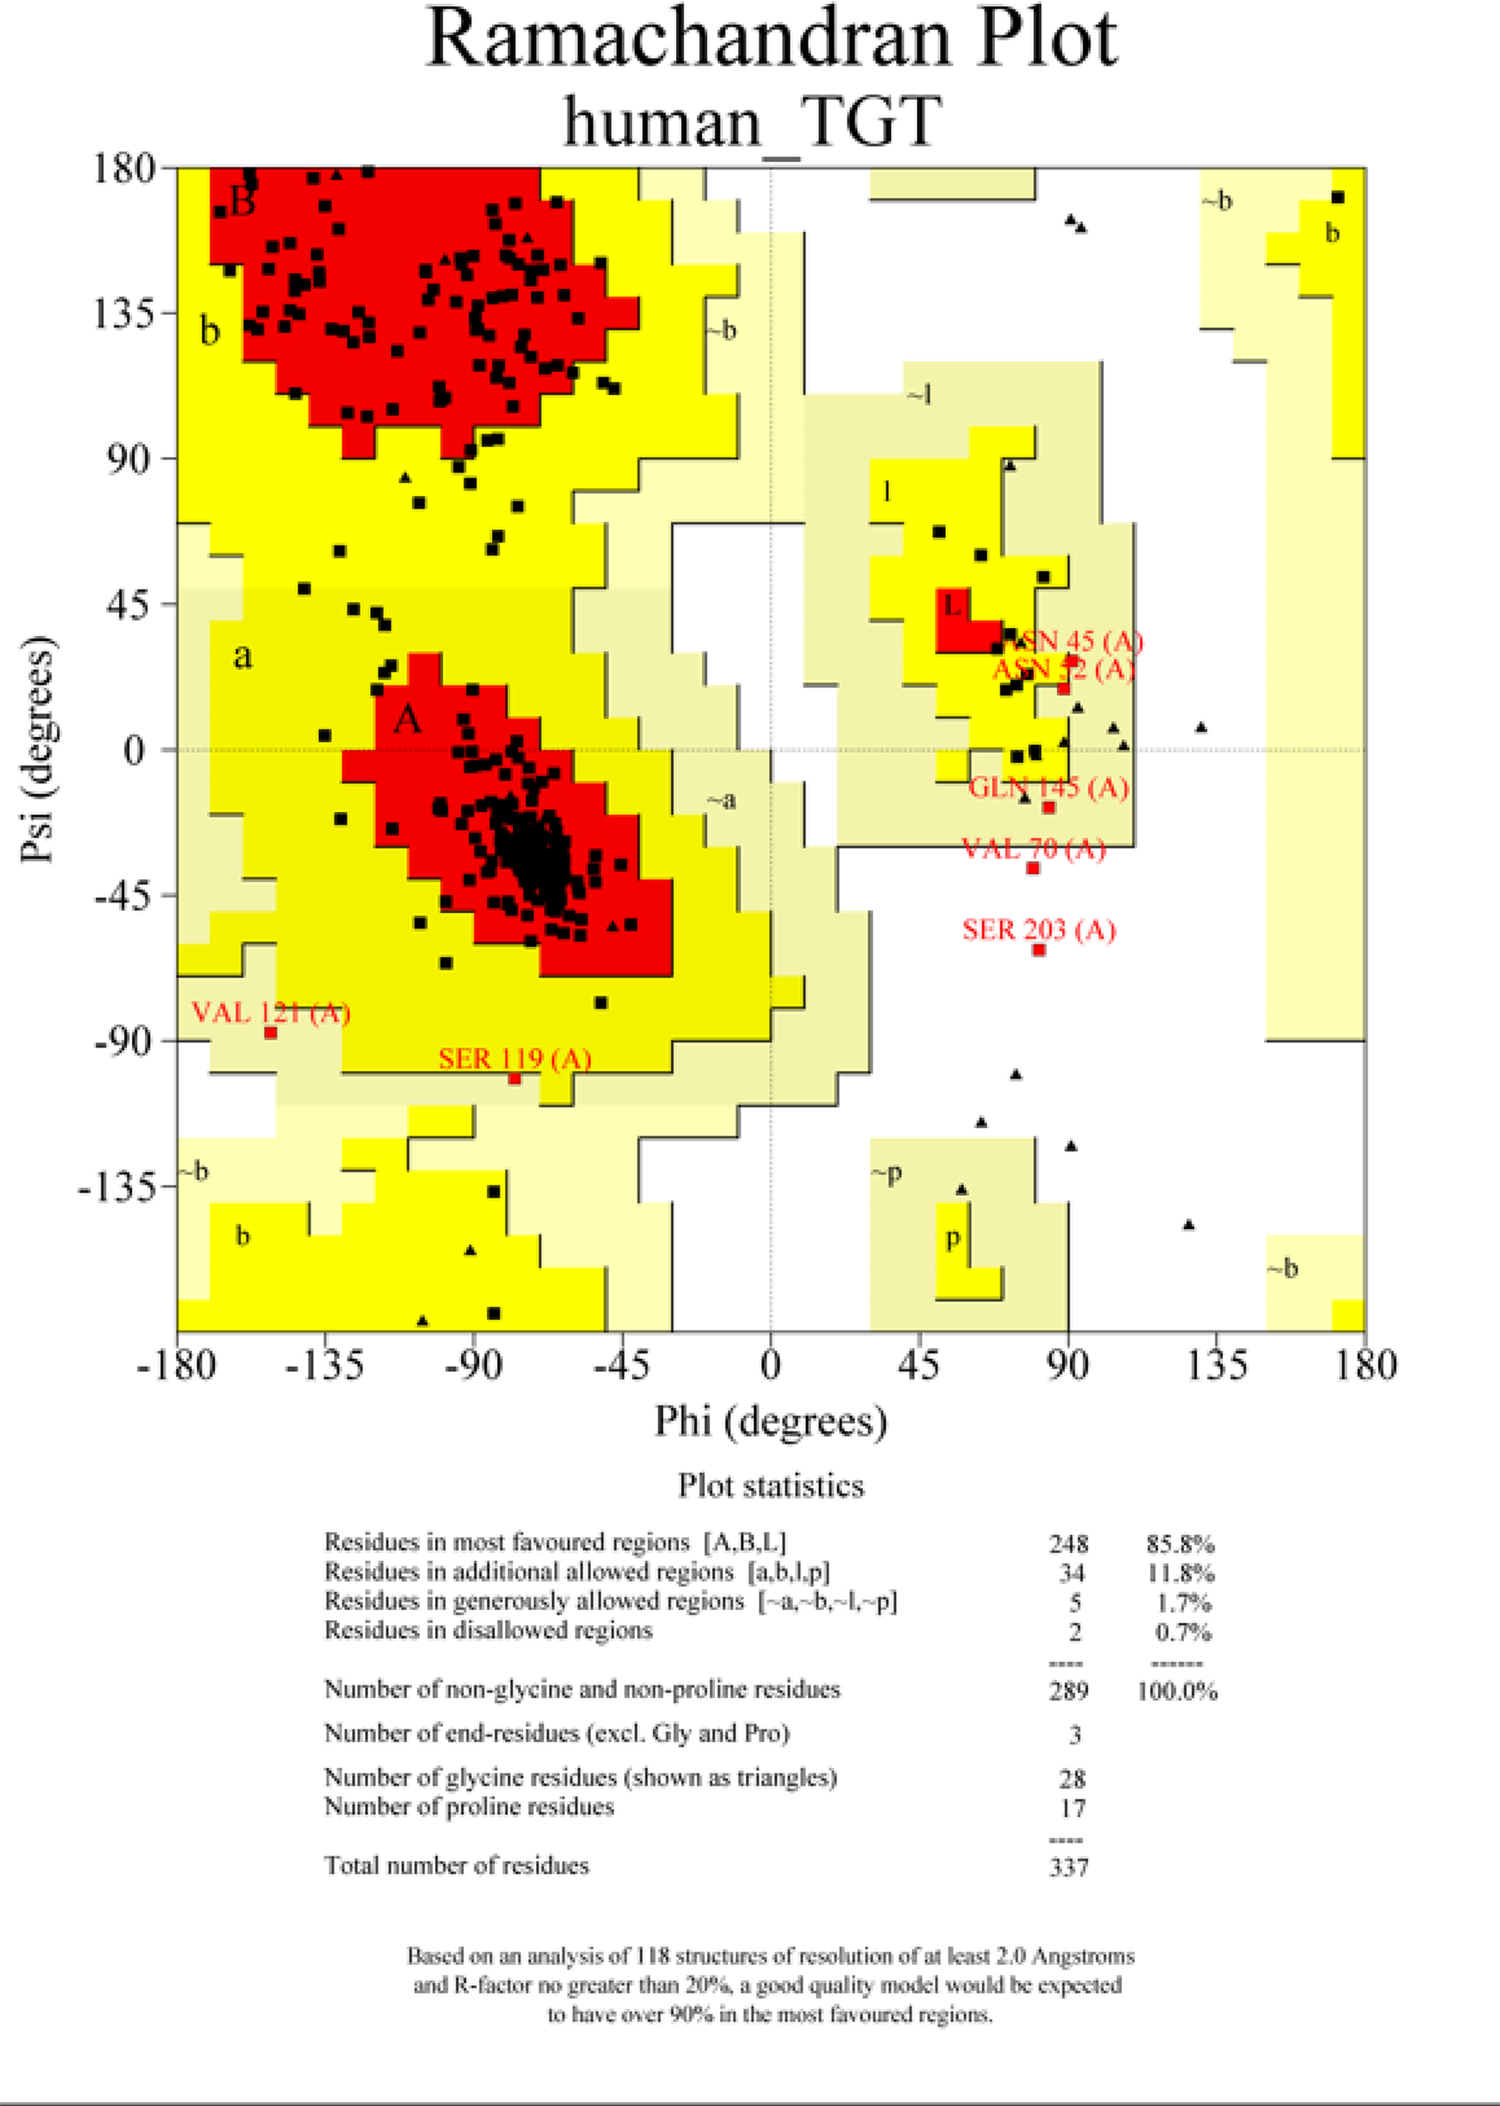

Supplement: Supplementary file 3 [file 1 › tbsd_a_1040074_sm9469.tif]

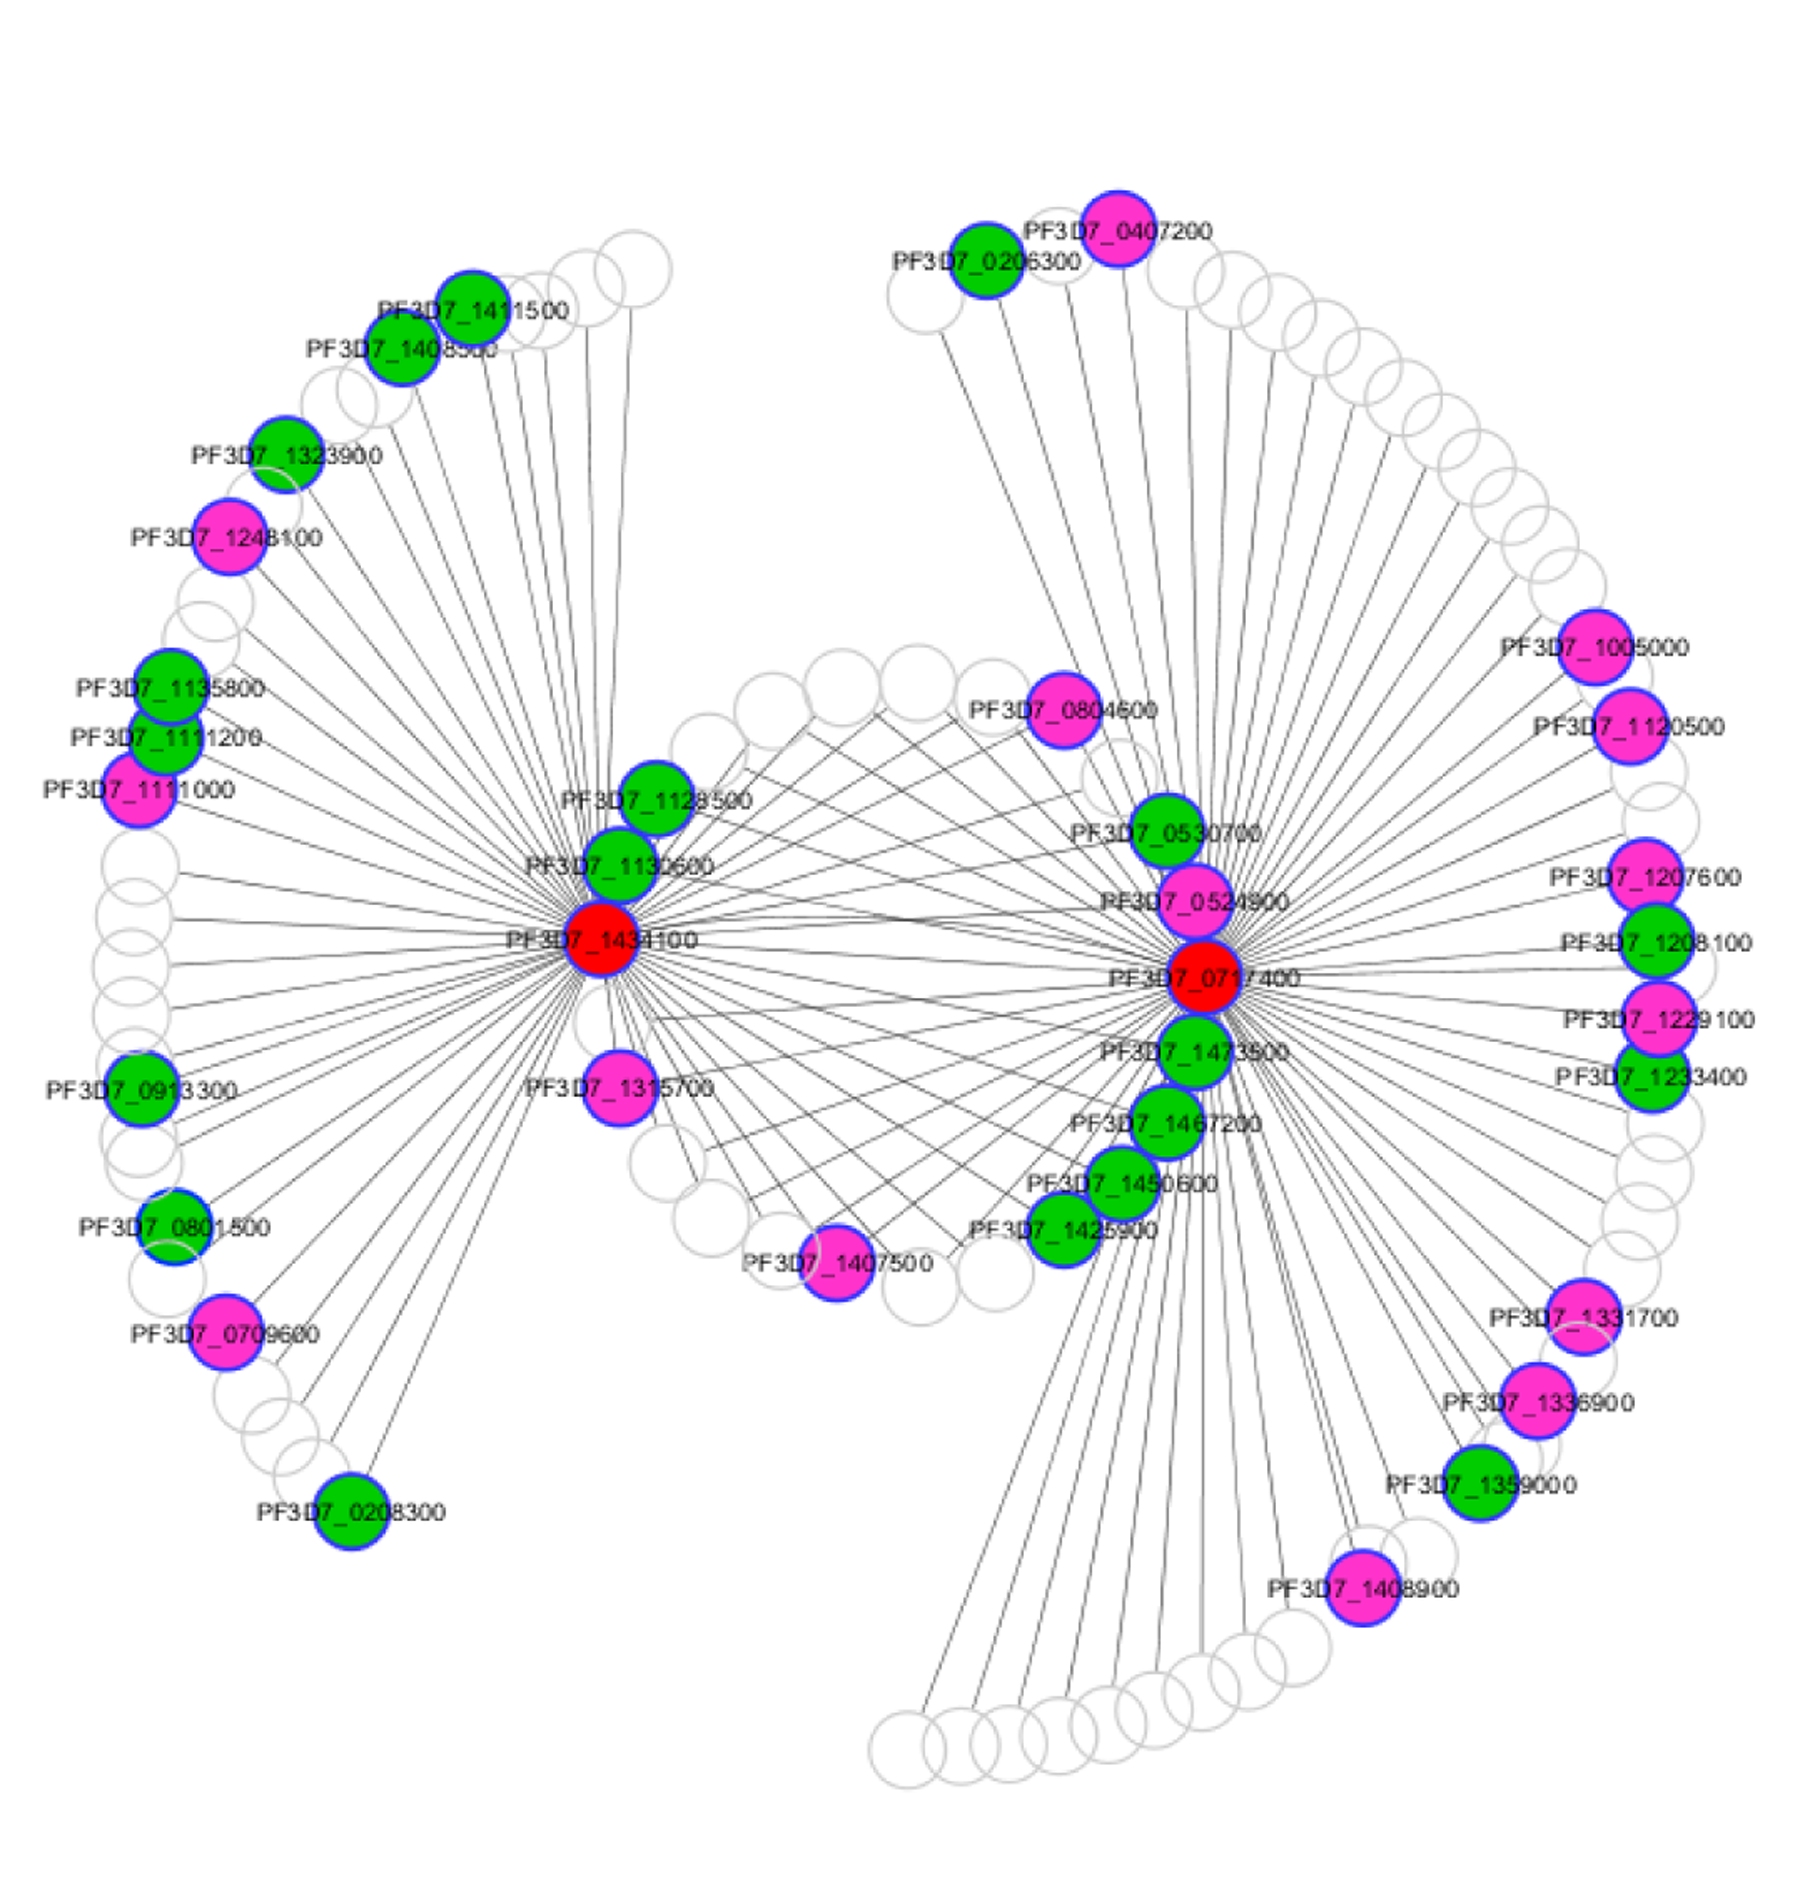

Supplement: Supplementary file 3 [file 1 › tbsd_a_1040074_sm9468.tif]

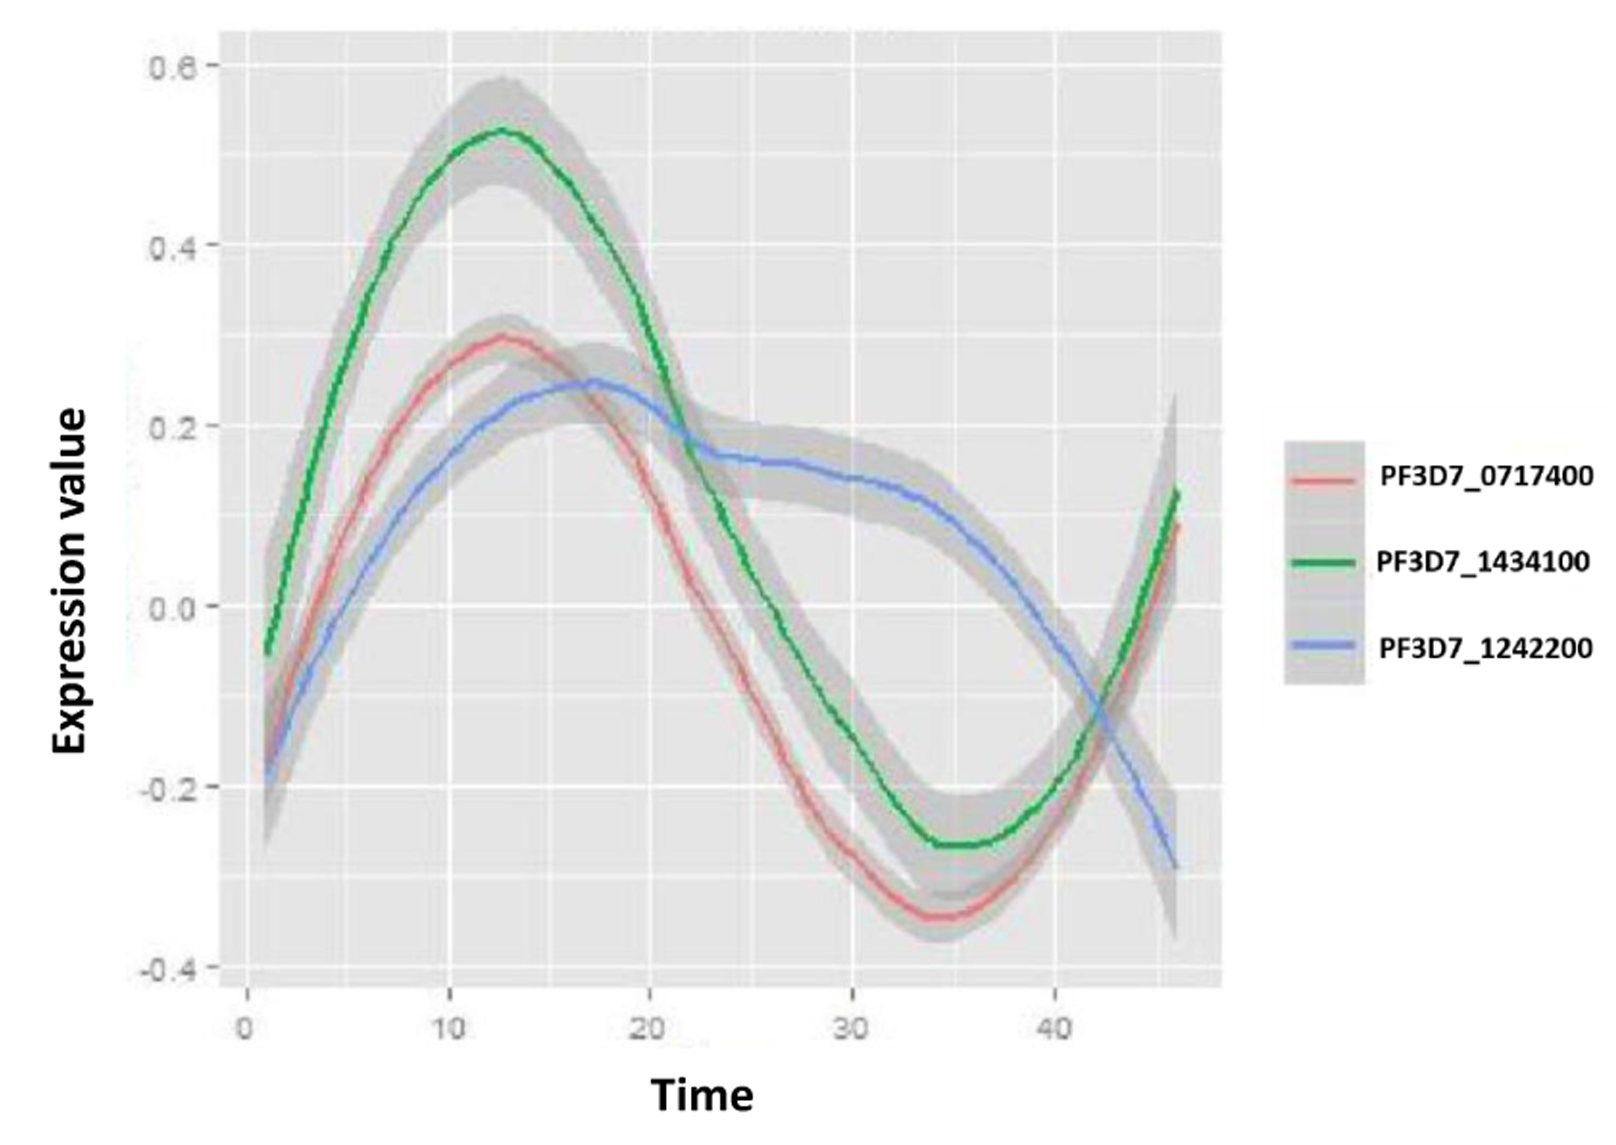

Supplement: Supplementary file 3 [file 1 › tbsd_a_1040074_sm9467.tif]
